# Supplementary material for: Modulation of face- and emotion-selective ERPs by the three most common types of face image manipulations
Source: PubMed Central journal article supplement — Soc Cogn Affect Neurosci. 2019 Apr 11;14(5):493–503. doi: 10.1093/scan/nsz027 (PMC6545565; doi:10.1093/scan/nsz027), 2019-04-11
Supplement: scan-18-384_nsz027.pdf [file scan-18-384_nsz027.pdf]

**Modulation of face- and emotion-selective ERPs by the three most common types of face image manipulations**

|                               |                                                                                                                                                                                                                                                                                                                                                                                                                                                                            |
|-------------------------------|----------------------------------------------------------------------------------------------------------------------------------------------------------------------------------------------------------------------------------------------------------------------------------------------------------------------------------------------------------------------------------------------------------------------------------------------------------------------------|
| Journal:                      | <i>Social Cognitive and Affective Neuroscience</i>                                                                                                                                                                                                                                                                                                                                                                                                                         |
| Manuscript ID                 | SCAN-18-384.R2                                                                                                                                                                                                                                                                                                                                                                                                                                                             |
| Manuscript Type:              | Original Manuscript                                                                                                                                                                                                                                                                                                                                                                                                                                                        |
| Date Submitted by the Author: | 20-Mar-2019                                                                                                                                                                                                                                                                                                                                                                                                                                                                |
| Complete List of Authors:     | <p>Schindler, Sebastian; University Hospital Münster, Institute of Medical Psychology and Systems Neuroscience<br/>                     Bruchmann, Maximilian; University of Münster, Institute of Medical Psychology and Systems Neurosciences<br/>                     Bublitzky, Florian; Zentralinstitut für Seelische Gesundheit,<br/>                     Straube, Thomas; University Hospital Münster, Institute of Medical Psychology and Systems Neuroscience</p> |
| Keywords:                     | EEG/ERP, faces, emotion, face naturalness, face realism                                                                                                                                                                                                                                                                                                                                                                                                                    |
|                               |                                                                                                                                                                                                                                                                                                                                                                                                                                                                            |

SCHOLARONE™  
 Manuscripts

1  
2  
3 1  
4  
5  
6 2  
7  
8  
9 3  
10  
11 4 **Modulation of face- and emotion-selective ERPs by the three most**  
12  
13  
14 5 **common types of face image manipulations**  
15

16  
17 6 Sebastian Schindler<sup>1\*</sup>, Maximilian Bruchmann<sup>1</sup>, Florian Bublitzky<sup>2</sup>, and Thomas  
18  
19 7 Straube<sup>1</sup>  
20

21 8  
22  
23 9 <sup>1</sup> Institute of Medical Psychology and Systems Neuroscience, University of Muenster  
24

25 10 <sup>2</sup> Central Institute of Mental Health Mannheim, Medical Faculty Mannheim/Heidelberg  
26  
27 11 University, Mannheim, Germany  
28  
29 12

30 13 \* Corresponding author  
31  
32 14  
33  
34 15  
35  
36  
37 16 **Correspondence address**  
38

39 17 Institute of Medical Psychology and Systems Neuroscience  
40  
41 18 University of Münster  
42  
43 19 Von-Esmarch-Str. 52, D-48149 Münster, Germany  
44  
45 20 e-mail: sebastian.schindler@ukmuenster.de

46 21 **Word count: Abstract** 193 words (max 200), **Whole document (excluding references, legends)**

47 22 5000 words (max 5000).  
48  
49 23  
50  
51  
52  
53  
54  
55  
56  
57  
58  
59  
60

## Abstract

In neuroscientific studies, the naturalness of face presentation differs: A third of published studies makes use of close-up full coloured faces, a third uses close-up grey-scaled faces, and another third employs cutout grey-scaled faces. Whether and how these methodological choices affect emotion-sensitive components of the event-related brain potentials (ERP) is yet unclear. Therefore, this preregistered study examined ERP modulations to close-up full-coloured and grey-scaled faces as well as cutout fearful and neutral facial expressions, while attention was directed to no-face oddballs.

Results revealed no interaction of face naturalness and emotion for any ERP component, but showed (however,) large main effects (were observed). Specifically, fearful faces and decreasing face naturalness elicited substantially enlarged N170 and EPN amplitudes and lower face naturalness also resulted in a larger P1. This pattern reversed for the LPP, showing linear increases in LPP amplitudes with increasing naturalness.

We observed no interaction of emotion with face naturalness, which suggests that face naturalness and emotion are decoded in parallel at these early stages. Researchers interested in strong modulations of early components should make use of cutout grey-scaled faces, while those interested in a pronounced late positivity should use close-up coloured faces.

**Keywords: EEG/ERP, faces, emotion, face naturalness, face realism**

## 1. Introduction

Human facial expressions are a quick channel for social communication (Jack & Schyns, 2015; Tsao & Livingstone, 2008). The human face enables the observer to recognize a unique identity, exhibiting information about age, gender and race, as well as emotional states (Jack & Schyns, 2015). Not surprisingly, there is a high interest in understanding how humans process faces, as well as in determining the neurophysiological correlates of face perception (e.g. see Bentin, Allison, Puce, Perez, & McCarthy, 1996; Haxby, Hoffman, & Gobbini, 2000).

A powerful method to investigate neuronal responses towards faces are event-related potentials (ERPs), which are modulated both by cognitive (e.g., expertise or familiarity for faces; see Itier, Van Roon, & Alain, 2011; Sagiv & Bentin, 2001), and by perceptual factors. These, for example, include spatial frequencies, luminance, and colour information of the stimulus (e.g., see Balas & Pacella, 2015; Prete, Capotosto, Zappasodi, Laeng, & Tommasi, 2015; Schindler, Schettino, & Pourtois, 2018), as well as presentation features such as the temporal (flickering) frequency (e.g., see Boremanse, Norcia, & Rossion, 2013).

Often, the earliest component of interest is the occipitally scored P1, which is characterized by a positive peak between 80 and 120 ms, and is thought to reflect early stages of stimulus detection, discrimination, and vigilance (Bublitzky & Schupp, 2012; Mangun & Hillyard, 1991; Vogel & Luck, 2000). The P1 is often found to be larger for faces compared to objects (Allison, Puce, Spencer, & McCarthy, 1999; Bentin et al., 1996). Studies dealing with ERP modulations caused by emotional expressions show mixed findings regarding the P1. Some studies report emotional modulations (e.g., see Blechert et al., 2012; Foti et al., 2010), while others do not detect them (e.g., see Smith et al., 2013; Wieser et al., 2012). Lately, it was hypothesised that this might

1 be explained by the facial expression intensity (Müller-Bardorff et al., 2018). In contrast  
2 to the P1, the later occurring negative occipito-temporal N170 potential, which peaks  
3 between 130 and 190 ms, seems to be face-sensitive (Allison et al., 1999; Ganis,  
4 Smith, & Schendan, 2012; Sagiv & Bentin, 2001; Schendan & Ganis, 2013). The N170  
5 is viewed as a structural encoding component (Eimer, 2011). Further, a recent meta-  
6 analysis showed that the N170 component can be reliably modulated by emotional  
7 compared to neutral expressions (Hinojosa, Mercado, & Carretié, 2015). The following  
8 occipito-temporal negativities (N250r and Early Posterior Negativity, peaking between  
9 200 and 300 ms) seem to relate to recognition processes of individual faces  
10 (Schweinberger & Neumann, 2016). The Early Posterior Negativity (EPN) is also  
11 enlarged for emotional compared to neutral stimuli, including face stimuli (Bublitzky,  
12 Gerdes, White, Riemer, & Alpers, 2014; Wieser, Pauli, Reicherts, & Mühlberger, 2010).  
13 The EPN indicates early attention mechanisms (e.g. Schupp et al., 2004). Finally, the  
14 Late Positive Potential arises from approximately 400 ms onwards over parietal  
15 regions. Faces compared to scrambles or objects seem to elicit a larger late positivity  
16 (Allison et al., 1999; González et al., 2011), while numerous studies report enhanced  
17 LPP amplitudes for emotional compared to neutral stimuli (e.g., for faces see Blechert  
18 et al., 2012; Bublitzky et al., 2014). The LPP indicates stimulus evaluation and  
19 controlled attention processes (Hajcak, Dunning, & Foti, 2009; Schupp, Fleisch,  
20 Stockburger, & Junghöfer, 2006).

21 To investigate emotional ERP modulations, researchers have presented emotional  
22 faces in various ways. While some studies make use of grey-scaled faces (e.g., see  
23 Peltola et al., 2014; Righi et al., 2012), others use full-coloured faces (e.g., see Calvo,  
24 Marrero, & Beltrán, 2013; Bublitzky, Pittig, Schupp, & Alpers, 2017). Further, to reduce  
25 perceptual differences, faces are often presented as cutouts, showing only core parts  
26 of the face. This follows the notion that not all parts of the face exhibit relevant

1  
2  
3 1 information about the emotional expression. As an example, for fearful faces, the eyes  
4  
5 2 constitute a crucial region for recognizing the emotional expression (e.g., see Adolphs,  
6  
7 3 2008; Wegrzyn, Bruckhaus, & Kissler, 2015), as well as for modulating ERP responses  
8  
9 4 (Li, Li, Wang, Zhu, & Luo, 2018).

10  
11  
12 5 By reviewing the last decade of scientific literature on emotional ERP modulations  
13  
14 6 for faces (2008–2018; see Supplementary Table S1 for detailed references), we found  
15  
16 7 for 100 published studies that almost a third of the studies used close-up coloured  
17  
18 8 faces (28), close-up grey-scaled faces (22), or cutout grey-scaled faces (27). However,  
19  
20 9 in most cases, the rationale of the stimulus selection is missing or is not clearly  
21  
22 10 described, nor is the stimulus' effect on ERP responses sufficiently explained. In some  
23  
24 11 cases, the heterogeneous use of face manipulations might contribute to conflicting  
25  
26 12 findings. So far, all studies which did not find an EPN emotion effect used close-up  
27  
28 13 coloured faces (Brenner, Rumak, Burns, & Kieffaber, 2014; Herbert, Sfaerlea, &  
29  
30 14 Blumenthal, 2013; Thom et al., 2013). Regarding P1, N170, and LPP components,  
31  
32 15 emotion effects, as well as null findings, have been reported with all face  
33  
34 16 manipulations. However, the size of emotion effects might differ depending on a given  
35  
36 17 face manipulation. Thus, the present study aimed to investigate effects of the three  
37  
38 18 most employed face manipulations in a within subject design.

39  
40  
41  
42  
43  
44 19 Cutting out uninformative noise homogenises the stimulus set, which reduces inter-  
45  
46 20 stimulus perceptual variance (IPSV) known to influence the N170 (e.g., see Thierry,  
47  
48 21 Martin, Downing, & Pegna, 2007a, 2007b; but see also Bentin et al., 2007; Rossion &  
49  
50 22 Jacques, 2008). On the other hand, it can be hypothesized that face-specific context  
51  
52 23 enhances emotional responsiveness, since specific facial features (colour, hair, etc.)  
53  
54 24 might contribute to a perceived unique identity. Hence, early and late stages of  
55  
56 25 processing could be affected by increasing the emotional salience of the expressions  
57  
58 26 of a unique person (e.g., see Schindler et al., 2017; Schulz et al., 2012; Itz et al., 2014).

1  
2  
3 1 In this vein, a multitude of studies shows that broader contextual information modulates  
4  
5 2 face perception. Here, ERP modulations were observed if contextual information was  
6  
7 3 provided for a face, either being affective background pictures (Wieser & Keil, 2013),  
8  
9 4 or verbal information (Wieser & Brosch, 2012). Further, preceding emotional or neutral  
10  
11 5 sentences modulated EPN as well as LPP responses towards inherently neutral  
12  
13 6 expressions. Thus, stimuli are integrated and processed with available contextual  
14  
15 7 features, which in turn could even include peripheral facial features.  
16  
17  
18

19 8 To explore the impact of face naturalness on emotional responses, we presented  
20  
21 9 the three most common face naturalness levels, showing close-up coloured faces,  
22  
23 10 close-up grey-scaled faces, and cutout grey-scaled faces. Based on the literature (on  
24  
25 11 ERP modulations), we expected main effects of emotional expression, leading to larger  
26  
27 12 N170, EPN, and – if LPP modulations could be observed – LPP amplitudes. Since  
28  
29 13 there are perceptual differences between the three different types of face image  
30  
31 14 manipulations, main effects for the P1 and N170 component were expected as well.  
32  
33 15 Furthermore, an enlarged LPP for more naturalistic faces was hypothesised (please  
34  
35 16 note, this was mentioned, but no formal preregistered hypothesis). Crucially, we tested  
36  
37 17 interactions of emotional expression and face naturalness. We tested if either  
38  
39 18 contextual face information, or, as an alternative, the reduction of uninformative noise  
40  
41 19 lead to more pronounced emotional modulations. These theoretical predictions,  
42  
43 20 together with a detailed description of the analysis pipeline, were preregistered on the  
44  
45 21 Open Science Framework (<https://osf.io/5fkt4/>).  
46  
47  
48  
49  
50  
51  
52  
53  
54  
55

## 23 2. Methods

56 24 **Participants.** Thirty-seven participants were recruited at the University of Münster.  
57  
58 25 Participants gave written informed consent and received 10 euros per hour for  
59  
60 26 participation. All participants had normal or corrected-to-normal vision, were right-

1 handed and had no reported history of neurological or psychiatric disorders. One  
2 participant aborted the experiment, leading to 36 participants in the final EEG analyses.  
3 On average, the 36 participants (24 female) were 24.06 ( $SD = 3.43$ ) years old (on  
4 average). Average rated tiredness (1 = fully awake, 10 = fully tired) before testing was  
5 2.73 ( $SD = 1.51$ ), during the face perception experiment 5.52 ( $SD = 1.73$ ), and after  
6 testing 5.09 ( $SD = 2.03$ ).

7 **Stimuli.** The faces were taken from the Radboud Faces database (Langner et al.,  
8 2010). For the experiment, faces were converted into greyscale and cutouts from the  
9 faces were used, showing no facial hair. Thirty-six identities (18 male, 18 female) were  
10 used, showing either fearful or neutral expressions, both presented in three different  
11 naturalness conditions: In the first condition, a coloured close-up of each face was  
12 used, while in the second condition, a grey-scaled close-up was used, and in the third  
13 condition, a grey-scaled cutout of the core face was presented. The cutout had an  
14 elliptical shape with x- and y-radii of  $2.29^\circ$  and  $3.77^\circ$  with blurred edges. As exemplified  
15 in Fig.1, the cutout removed any facial hair, the ears and the neck in each image. In  
16 line with the suggested maximal influence of fearful faces in naturalistic environments  
17 (Hedger, Adams, & Garner, 2015), presented face-pictures exhibited a visual angle of  
18 about  $6.2^\circ$  (bizygomatic diameter). Stimuli were presented on a Gamma-corrected  
19 display (Iiyama G-Master GB2488HSU) running at 60 Hz with a Michelson contrast of  
20 .9979 ( $L_{min} = 0.35 \text{ cd/m}^2$ ;  $L_{max} = 327.43 \text{ cd/m}^2$ ). The background luminance was kept  
21 at  $262.53 \text{ cd/m}^2$ .



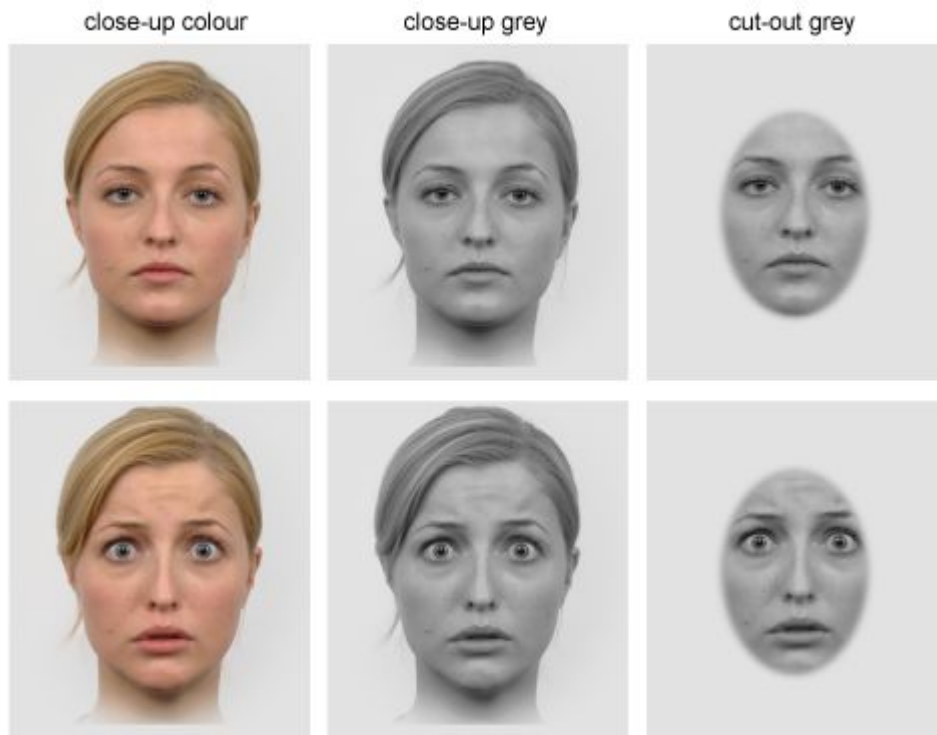

**Figure 1: Example facial stimuli showing fearful and neutral expressions.** Please note that background colour was identical in all experiments and displayed facial features size (e.g. eyes, nose, and mouth) was kept constant.

**Procedure.** Participants were instructed to avoid eye-movements and blinks during stimulus presentation. To ensure that participants paid attention to the presented faces, gaze position was evaluated online with an eye tracker (EyeLink 1000, SR Research Ltd., Mississauga, Canada), stopping the presentation whenever the centre was not fixated. Thus, stimulus presentation was paused whenever participants were not directing their gaze at a circular region with a radius of  $0.7^\circ$  around the fixation mark. If a gaze deviation was detected for more than five seconds despite a participant's attempt to fixate the centre, the eye-tracker calibration procedure was automatically initiated. For eleven participants, eye-tracking data could not be recorded due to technical difficulties. In these cases, we relied on the participants' following the instructions (to focus) and focussing on the central fixation mark. Additionally, participants were instructed to respond to a non-face trial by pressing the space bar.

1  
2  
3 1 Response feedback was provided for hits (key presses within 1 second after non-face  
4  
5 2 presentation), slow responses (key presses within 1 to 3 seconds) and false alarms  
6  
7 3 (key presses outside these windows) through a corresponding text presented for 2 s  
8  
9 4 at screen centre. Non-faces consisted of phase-scrambled faces, i.e. random patterns.  
10  
11  
12 5 The three image naturalness levels were presented in separate blocks, with the order  
13  
14 6 of blocks counterbalanced across participants. Within each block of a given face  
15  
16 7 naturalness, 60 fearful, 60 neutral faces and 5 non-face oddballs were presented in  
17  
18 8 randomized order. In each trial, a fixation mark was presented jittering between 300  
19  
20 9 and 700 ms, followed by a face for 50 ms, and then followed by a blank screen  
21  
22 10 presented for 500 ms before the next trial started. After testing, participants were asked  
23  
24 11 about effort and difficulty of the experiment, tiredness during and after the experiment,  
25  
26 12 and their subjective most intense emotional responsiveness towards given face  
27  
28 13 categories.  
29  
30  
31  
32

33  
34 14 It is important to note that participants completed two preceding experiments.  
35  
36 15 The first experiment took approximately 50 minutes, manipulating perceptual load and  
37  
38 16 directing attention to letters while task-irrelevant angry, happy or neutral faces or  
39  
40 17 scrambled distracters were presented. Afterwards, participants had a long break to rest  
41  
42 18 and refresh. Then, they started a face perception experiment, each lasting for  
43  
44 19 approximately 10 minutes, presenting fearful and neutral faces with manipulated  
45  
46 20 spatial frequencies.  
47  
48  
49

50 21 **EEG recording and preprocessing.** EEG signal was recorded from 64 BioSemi  
51  
52 22 active electrodes using Biosemi's Actview software ([www.biosemi.com](http://www.biosemi.com)). Four  
53  
54 23 additional electrodes measured horizontal and vertical eye-movements. The recording  
55  
56 24 sampling rate was 512 Hz. As recording reference, Biosemi uses two separate  
57  
58 25 electrodes as ground electrodes, a Common Mode Sense active electrode (CMS) and  
59  
60

1  
2  
3 1 a Driven Right Leg passive electrode (DLR), which form a feedback loop that enables  
4  
5 2 measuring the average potential close to the reference in the A/D-box. Data were re-  
6  
7 3 referenced offline to an average reference, and a 0.1 Hz high-pass forward filter (6  
8  
9 4 db/oct) as well as a 30 Hz low-pass zero phase filter (24 db/oct) were applied.  
10  
11 5 Recorded eye-movement was corrected using the automatic eye-artefact correction  
12  
13 6 method implemented in BESA (Ille, Berg, & Scherg, 2002). Filtered data were  
14  
15 7 segmented from 100 ms before stimulus onset until 800 ms after stimulus presentation.  
16  
17 8 Baseline-correction was used 100 ms before stimulus onset. On average, 4.49  
18  
19 9 electrodes ( $SD = 2.21$ ) were interpolated. For close-up coloured fearful faces, an  
20  
21 10 average of 52.83 trials was kept, for close-up coloured neutral faces 52.36 trials, for  
22  
23 11 close-up grey-scaled fearful faces 52.06 trials, for close-up grey-scaled neutral faces  
24  
25 12 53.75 trials, for cutout grey-scaled fearful faces 53.64 trials, and for cutout grey-scaled  
26  
27 13 neutral faces 53.75 trials. . There were no differences in the number of kept trials  
28  
29 14 between emotional expressions ( $F_{(1,35)} = 0.44$ ,  $p = .513$ , partial  $\eta^2 = .012$ ), face  
30  
31 15 naturalness ( $F_{(2,70)} = 0.72$ ,  $p = .492$ , partial  $\eta^2 = .020$ ), or an interaction (between) of  
32  
33 16 both ( $F_{(2,70)} = 1.25$ ,  $p = .294$ , partial  $\eta^2 = .034$ ).

34  
35  
36  
37  
38  
39  
40 17 **EEG data analyses.** EEG scalp-data was statistically analysed with EMEGS (Peyk,  
41  
42 18 De Cesarei, & Junghöfer, 2011). Two (emotion: fearful vs. neutral expression) by three  
43  
44 19 (face naturalness: close-up colour vs. close-up grey-scale vs. cutout grey-scale)  
45  
46 20 repeated measure ANOVAs were set-up to investigate main effects of emotional  
47  
48 21 expression and face naturalness, as well as their interaction in time windows and  
49  
50 22 electrode clusters of interest. Finally, we preregistered that ERP modulations might not  
51  
52 23 be sufficiently large enough to detect slight effects of naturalness, planning Bayesian  
53  
54 24  $t$ -tests to detect possible differences in emotional modulations between close-up  
55  
56 25 coloured faces and cutout grey-scale faces (see <https://osf.io/5fkt4/>). The null  
57  
58 26 hypothesis was specified as a point-null prior (i.e., standardized effect size  $\delta = 0$ ),

1  
2  
3 1 whereas the alternative hypothesis was defined as a Jeffrey-Zellner-Siow (JZS) prior,  
4  
5 2 i.e., a folded Cauchy distribution centred around  $\delta = 0$  with scaling factors of  $r = 0.707$ ,  
6  
7 3 and BF scores above (below) 1 indicating that the data are less (more) likely under the  
8  
9 4 null relative to the alternative hypothesis. Partial eta-squared (partial  $\eta^2$ ) were  
10  
11 5 estimated to describe effect sizes, where  $\eta_p^2 = 0.02$  describes a small,  $\eta_p^2 = 0.13$  a  
12  
13 6 medium and  $\eta_p^2 = 0.26$  a large effect (Cohen, 1988). Time windows were segmented  
14  
15 7 from 80 to 100 ms for the P1, from 130 to 170 ms for the N170, from 230 to 330 ms to  
16  
17 8 investigate EPN effects, and from 400 to 600 ms to investigate LPP effects. Since the  
18  
19 9 N170 peaked at about 140 ms (in line with the literature, e.g., see Itier & Taylor, 2004),  
20  
21 10 we carefully re-checked and validated the correct trigger timing. For the P1, an occipital  
22  
23 11 cluster (O1, O2, Oz, PO7, PO8) was examined, while for the N170 and EPN time  
24  
25 12 windows, two symmetrical occipital clusters were examined (left: O1, PO7, P7, P9;  
26  
27 13 right: O2, PO8, P8, P10). However, laterality did not affect the results (for detailed  
28  
29 14 analyses see the Supplement). For the LPP, a centro-parietal cluster was examined  
30  
31 15 (P1, P2, Pz, CP1, CP2, CPz; see the Supplementary Figure S1 for an overview of the  
32  
33 16 data and the used electrode clusters).

34  
35  
36  
37  
38  
39  
40 17 **Eye-tracking data:** The eye-tracking data were only used for online gaze control. We  
41  
42 18 chose not to perform any offline analyses as the experiment was designed to  
43  
44 19 discourage eye movements anyway and inter-stimulus intervals were likely too small  
45  
46 20 to observe systematic changes in pupil dilation.  
47  
48  
49  
50  
51  
52  
53

### 22 3. Results

#### 23 Manipulation check

54  
55  
56  
57  
58 24 In an open questionnaire, participants reported highest emotionality for close-up  
59  
60 25 coloured faces. While most reported similar emotional responses to all fearful faces

1 (19 participants), some reported no intensive emotional experience for any given face  
2 (5 participants) or did not comment (8 participants).

### 3 **P1 component**

4 For the P1, no main effects of emotion ( $F_{(1,35)} = 3.02, p = .091, \text{partial } \eta^2 = .079$ ), or  
5 (face) naturalness ( $F_{(2,70)} = 1.79, p = .175, \text{partial } \eta^2 = .049$ ; see Figure 2), as well as  
6 no interaction between emotion and face naturalness ( $F_{(2,70)} = 0.59, p = .942, \text{partial } \eta^2$   
7  $= .002$ ) were observed. Explorations between the extreme positions conducted by  
8 Bayesian  $t$ -tests (please see the preregistered protocol in the Open Science  
9 Framework, <https://osf.io/5fkt4/>), revealed that no difference in emotion effects  
10 between the close-up coloured faces and the grey-scaled cutout faces was about five  
11 times more likely than the existence of actual differences ( $\text{BF}_{01} = 5.316, \text{error } \%$   
12  $0.0000207$ ).

13

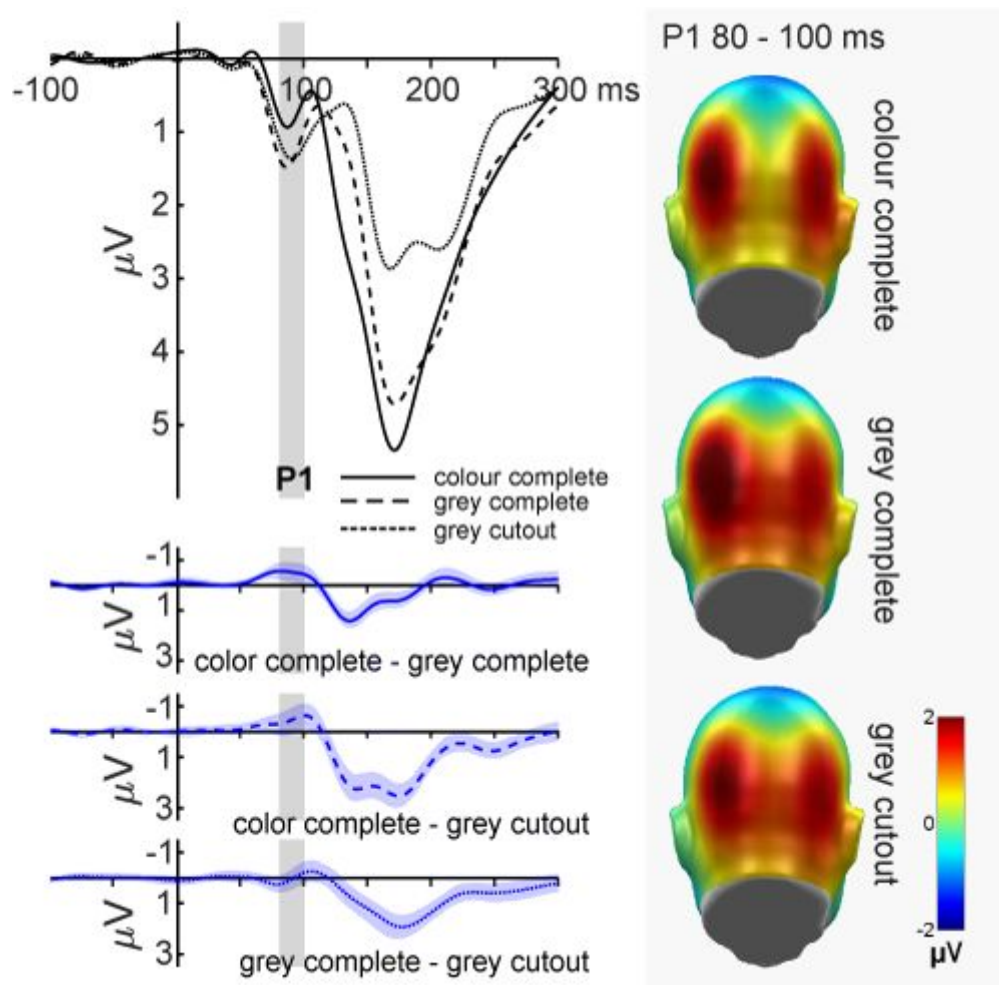

**Figure 2: P1 modulations by depicted face naturalness.** The left panel shows the time course for all face naturalness conditions, averaged over electrodes O1, Oz, O2. The right panel shows the amplitudes for each face naturalness condition. P1 amplitudes did not significantly differ between the naturalness levels. All difference plots (blue) contain 95% bootstrap confidence intervals of intra-individual differences.

#### *Exploratory P1 component analyses for face naturalness:*

Since main effects of face naturalness were expected but absent at the P1, we first re-analysed the P1 with more lateralized sensors (left: P9, P7, PO7, O1; right: P10, P8, PO8, O2; see Supplementary Figures S1 and S2 and the Supplement for detailed analyses) and more medial sensors (O1, Oz, O2). For the medial sensor group, no main effect of emotion was found ( $F_{(1,35)} = 3.74$ ,  $p = .061$ , partial  $\eta^2 = .061$ ), but a significant main effect of face naturalness was observed ( $F_{(1.69,59.25)} = 3.37$ ,  $p = .048$ , partial  $\eta^2 = .088$ ; see Figure 2). Here, close-up coloured faces elicited a smaller P1

1 compared to close-up grey-scaled faces ( $p = .008$ ), but not significantly compared to  
2 cutout grey-scaled faces ( $p = .081$ ). The two grey-scaled face conditions did not differ  
3 from one another ( $p = .821$ ). Again, no interaction between emotion and face  
4 naturalness was detected ( $F_{(2,70)} = 0.18$ ,  $p = .840$ , partial  $\eta^2 = .005$ ).

## 5 **N170**

6 For the N170, large main effects of emotion ( $F_{(1,35)} = 40.34$ ,  $p < .001$ , partial  $\eta^2 = .535$ ;  
7 see Figure 3a, 3c, 3d), and naturalness were found ( $F_{(2,70)} = 60.55$ ,  $p < .001$ , partial  $\eta^2$   
8 = .634; see Figure 4a, 4b, 4c), but no interaction between emotion and face  
9 naturalness ( $F_{(2,70)} = 1.44$ ,  $p = .243$ , partial  $\eta^2 = .040$ ; see Figure 3e, 3f). For the main  
10 effect of emotion, fearful expressions elicited a larger N170 compared to neutral  
11 expressions. Regarding face naturalness, cutout grey-scaled faces showed the largest  
12 N170 amplitudes, followed by close-up grey-scaled faces, and eventually close-up  
13 coloured faces. To investigate this closer, polynomial trends were tested, showing  
14 linearly increasing N170 amplitudes with decreasing face naturalness ( $F_{(1, 35)} = 78.79$ ,  
15  $p < .001$ ; explained 92% of the naturalness variance), while a quadratic contrast was  
16 also significant ( $F_{(1, 35)} = 15.13$ ,  $p < .001$ ; 8% variance explained). Explorations for  
17 differences between fearful and neutral faces were tested for the extreme positions of  
18 face naturalness by using Bayesian  $t$ -tests. These tests showed that no difference in  
19 emotion effects between the close-up coloured faces and the grey-scaled cutout faces  
20 was approximately four times more likely than the existence of actual differences (BF  
21  $_{01} = 4.392$ , error % 0.00001435).

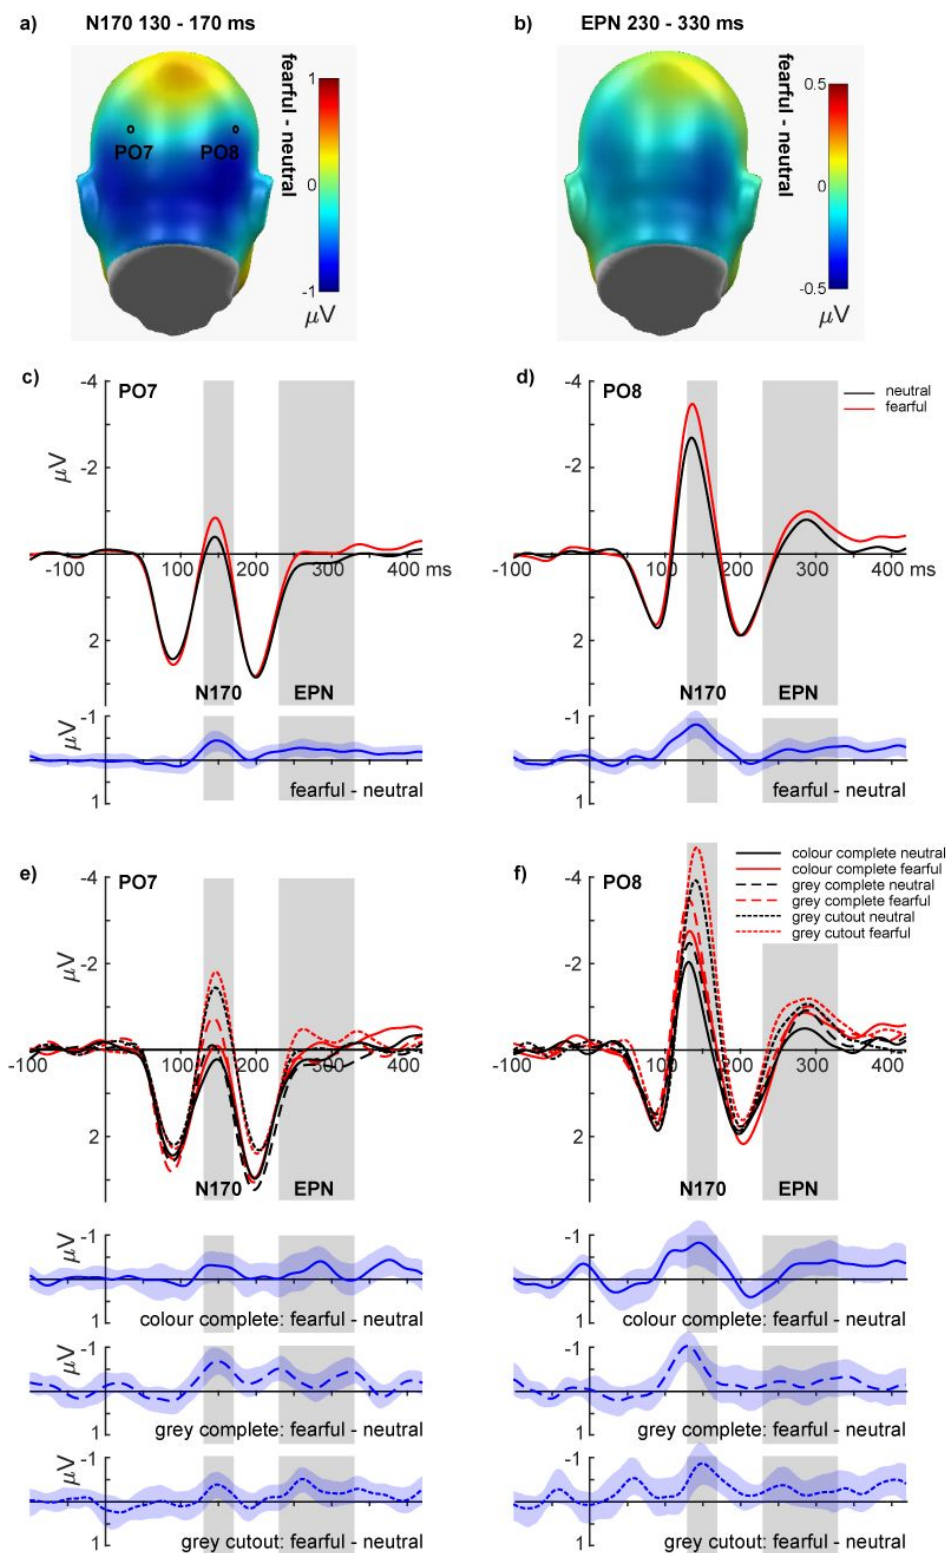

**Figure 3: Emotion effects for the N170 and EPN components.** a and b) Difference topographies, showing enhanced negativity for fearful faces over occipital areas. c and d) The time course for main effects of emotions at electrodes PO7 and PO8. e and f) Time course for all conditions, showing similar emotion increases at electrodes PO7 and PO8. All difference plots (blue) contain 95% bootstrap confidence intervals of intra-individual differences.



## 1 EPN

2 Regarding the EPN, main effects of emotion ( $F_{(1,35)} = 8.21, p = .007, \text{partial } \eta^2 = .190$ ;  
3 see Figure 3b, 3c, 3d), and (face) naturalness were found ( $F_{(2,70)} = 4.40, p = .016$ ,  
4 partial  $\eta^2 = .112$ ; see Figure 4a, 4b, 4d), while no interaction between emotion and face  
5 naturalness was observed ( $F_{(2,70)} = 0.104, p = .901, \text{partial } \eta^2 = .003$ ; see Figure 3e,  
6 3f). For the main effect of emotion, fearful expressions elicited a larger posterior  
7 negativity compared to neutral expressions. Regarding face naturalness, cutout grey-  
8 scaled faces elicited a larger EPN compared to both close-up grey-scaled faces and  
9 close-up coloured faces ( $ps < .05$ ). To investigate this closer, polynomial trends were  
10 tested, showing linearly increasing EPN amplitudes with decreasing face naturalness  
11 ( $F_{(1, 35)} = 4.766, p = .036$ ; explained 77% of the naturalness variance). Here, a quadratic  
12 contrast was not significant ( $F_{(1, 35)} = 3.48, p = .071$ ; 23% variance explained).  
13 Explorations for differences between fearful and neutral faces were conducted for the  
14 extreme positions of face naturalness by using Bayesian  $t$ -tests. These tests revealed  
15 that no difference in emotion effects between the close-up coloured faces and the grey-  
16 scaled cutout faces was about five times more likely than the existence of actual  
17 differences ( $BF_{01} = 5.555, \text{error } \% 0.00002235$ ).

## 18 LPP

19 For the late positive potential, no main effect of emotion was found ( $F_{(1,35)} = 0.002, p =$   
20  $.968, \text{partial } \eta^2 < .001$ ), while a main effect of naturalness could be observed ( $F_{(2,70)} =$   
21  $5.28, p = .007, \text{partial } \eta^2 = .131$ ; see Figure 4e, 4f). Again, no interaction between  
22 emotion and face naturalness was observed ( $F_{(2,70)} = 0.640, p = .531, \text{partial } \eta^2 = .018$ ).  
23 For the main effect of face naturalness, close-up coloured faces elicited the largest  
24 LPP amplitudes, being significantly larger than for cutout grey-scaled faces ( $p = .002$ )  
25 while statistically not being significantly larger than close-up grey-scaled faces ( $p =$

1  
2  
3 1 .148). There were also no significant differences between close-up and cutout grey-  
4  
5 2 scaled faces ( $p = .097$ ). To investigate this closer, polynomial trends were tested, this  
6  
7 3 time showing strongly linearly increasing LPP amplitudes with increasing face  
8  
9 4 naturalness ( $F_{(1, 35)} = 11.343, p = .002$ ; explained 99,7% of the naturalness variance),  
10  
11 5 and the quadratic contrast was not significant ( $F_{(1, 35)} = 0.034, p = .071$ ; 0,3% variance  
12  
13 6 explained). Explorative analyses for differences between fearful and neutral faces were  
14  
15 7 tested for the extreme positions of face naturalness by using Bayesian  $t$ -tests. No  
16  
17 8 difference in emotion effects between the close-up coloured faces and the grey-scaled  
18  
19 9 cutout faces was about three times more likely than the existence of actual differences  
20  
21  
22  
23  
24 10 ( $BF_{01} = 3.221, \text{error \% } 0.00000322$ ).

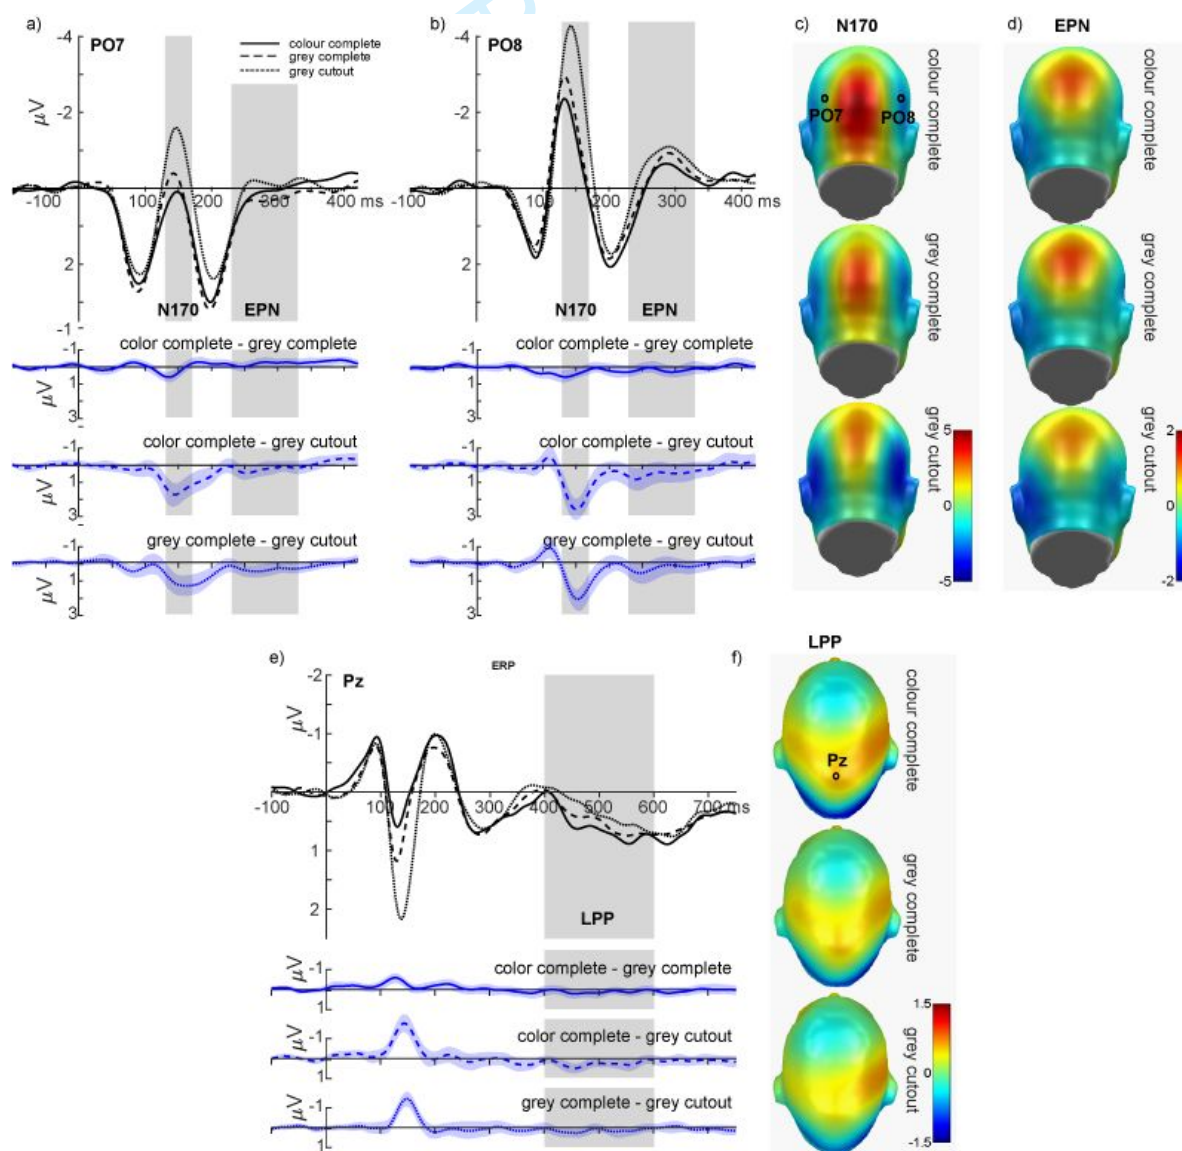

1  
2  
3 **Figure 4: Naturalness effects for the N170, EPN and LPP components. a and b)**  
4 display the time course for electrodes PO7, PO8, respectively. **c and d)** show the  
5 topographies for each face naturalness level in the EPN and LPP interval, respectively,  
6 indicating stronger negativity and lower positivity for decreasing face naturalness. **e**  
7 and **f)** display time courses and topographies for the LPP component. All difference  
8 plots (blue) contain 95% bootstrap confidence intervals of intra-individual differences.  
9  
10  
11  
12

#### 8 **4. Discussion**

9 As predicted, main effects of emotion were detected for the N170 and EPN component.  
10 In line with a recent meta-analysis (Hinojosa et al., 2015), emotional expressions  
11 already influenced the N170, showing pronounced amplitudes for fearful relative to  
12 neutral faces. Drawing from their literature review, Hinojosa and colleagues (2015)  
13 reasoned that this might reflect parallel processing of the emotional expression and  
14 facial information (see also Eimer, 2011; Joyce & Rossion, 2005; for a review on  
15 structural encoding and person discrimination, see Calder & Young, 2005). Further, in  
16 line with previous research, an enhanced processing of fearful compared to neutral  
17 faces was found for the EPN (Luo, Feng, He, Wang, & Luo, 2010; Morel, George,  
18 Foucher, Chammat, & Dubal, 2014; Peltola et al., 2014; Wieser et al., 2012).  
19 **Interestingly, modulations of the N170 and EPN by emotional expressions were found**  
20 **to be present across different common tasks, while the size of the emotion effect did**  
21 **not vary between a gender discrimination, an explicit emotion discrimination and an**  
22 **oddball detection task (Itier & Neath-Tavares, 2017).** The EPN component is related  
23 to early attentional selection and this differential processing is thought to reflect  
24 enhanced early attention devoted to evolutionary more relevant (i.e. fearful) faces  
25 (Schupp et al., 2006).

26 No emotional modulation was observed with regard to very early (P1 component)  
27 and later elaborative stimulus processing (LPP). This is partly in line with the mixed  
28 results of previous research, and regarding the LPP, might be due to the relatively

1  
2  
3 1 lower emotional engagement of the present face perception task. Specifically when  
4  
5 2 using passive viewing designs, LPP emotion effects are sometimes not found  
6  
7 3 (Rellecke, Sommer, & Schacht, 2012; Schindler et al., 2017; Yuan, Zhou, & Hu, 2014).  
8  
9  
10 4 In this study, participants had to simply look at the face stimuli and respond from time  
11  
12 5 to time to a non-facial oddball stimulus. Thus, no elaborate attention to the briefly  
13  
14 6 presented facial expression was needed for correct task performance, which might  
15  
16 7 explain the absence of late emotion effects in the present study.  
17  
18

19  
20 8 For face naturalness main effects, we expected modulations of early components  
21  
22 9 (P1, N170), as well as for the LPP, where enlarged LPP amplitudes might reflect  
23  
24 10 perceived higher distinctiveness. Surprisingly, the initial, preregistered analyses for the  
25  
26 11 P1 showed no main effect of face naturalness. However, exploratory analyses using  
27  
28 12 more occipital sensors (O1, Oz, and O2) revealed a significant main effect of face  
29  
30 13 naturalness. Here, a decreased P1 for close-up coloured faces was found compared  
31  
32 14 to close-up grey-scaled faces, and, in tendency, compared to cutout grey-scaled faces.  
33  
34 15 Thus, while P1 effects are detectable, the (spatial) extension of these effects is limited,  
35  
36 16 which could relate to the rather small visual angle of the stimuli, and/or the blockwise  
37  
38 17 presentation mode, possibly introducing adaptation effects.  
39  
40  
41  
42

43 18 The subsequently peaking N170, EPN, and LPP amplitudes were found to be  
44  
45 19 linearly modulated by face naturalness. Here, N170 and EPN amplitudes were  
46  
47 20 enlarged in a linear fashion for decreasing face naturalness. An explanation for the  
48  
49 21 strong effects at the N170 might be the decreasing interstimulus perceptual variance  
50  
51 22 (ISPV) going along with decreasing naturalness (e.g., see Thierry et al., 2007a,  
52  
53 23 2007b). It is important to note that for each level of decreasing face naturalness, we  
54  
55 24 removed information (first colour, then hair information), which logically decreased  
56  
57 25 stimulus-variance of all faces in the respective condition. Indeed, controlling for ISPV  
58  
59  
60

1 has been found to reduce or even abolish differences in N170 amplitudes between  
2 faces and objects (e.g., see Thierry et al., 2007a, 2007b), although it is important to  
3 note that even with zero variance, faces elicit larger N170 amplitudes than objects  
4 (Ganis et al., 2012; Schendan & Ganis, 2013). In our study, by cutting out more variable  
5 colour, and especially hair/neck information, stimuli became more alike (e.g., see  
6 Figure 1). Whereas ISPV has been related to the N170 component (i.e. less variable  
7 stimuli by pixel-by-pixel correlations), we are not aware of any study showing that  
8 stimulus variability could also affect the EPN.

9 Another interpretation for the enlarged N170 and EPN amplitudes might relate to  
10 an increased processing difficulty for less natural faces. Although identity recognition  
11 was not task-relevant, this often occurs spontaneously and is much harder for cutout  
12 faces. Task difficulty has been shown to elicit larger N170 amplitudes, for instance, for  
13 low-frequency filtered faces (LSF) in a challenging gender categorization task  
14 (Goffaux, Jemel, Jacques, Rossion, & Schyns, 2003). Furthermore, larger N170  
15 amplitudes have been reported for inverted compared to upright faces (e.g., see  
16 Latinus & Taylor, 2006), this face inversion effect even correlates with task  
17 performance (Jacques & Rossion, 2007).

18 Interestingly, at late stages of processing, we observed an opposite pattern, with  
19 enlarged amplitudes in the LPP time window for more naturalistic faces. Enhanced  
20 LPP responses have been observed in previous studies for faces with exaggerated  
21 facial features or real compared to less realistic and distinctive cartoon faces (e.g., see  
22 Schindler et al., 2017; Schulz et al., 2012; Itz et al., 2014). In this experiment, the very  
23 same faces were shown – while only colour and hair information was added. This  
24 manipulation might have increased subjective distinctiveness or face uniqueness. A  
25 relation between distinctive (and) unique faces and enhanced LPPs has been reported

1  
2  
3 1 previously (similar to e.g. Kaufmann & Schweinberger, 2008; Schulz et al., 2012).  
4  
5 2 However, our manipulation of face naturalness is no strict manipulation of face-  
6  
7 3 uniqueness or face-distinctiveness. Thus, according to our predictions, faces with  
8  
9 4 richer information (including colour and hair) might be perceived as more unique and/or  
10  
11 5 distinct, leading to a larger late positivity.  
12  
13  
14

15 6 Crucially, we predicted interaction effects between emotional expression and face  
16  
17 7 naturalness. The basic idea was that faces with more contextual information (i.e.,  
18  
19 8 colour and hair), display more diagnostic emotion features (relative to grey-scaled  
20  
21 9 cutout faces), thus leading to pronounced neural differentiation between fearful and  
22  
23 10 neutral faces. However, the present data does not show significant interaction effects  
24  
25 11 between face naturalness and emotion for any of the investigated ERP components.  
26  
27 12 Moreover, using a Bayesian approach, moderate support for the null hypothesis was  
28  
29 13 observed (i.e., no interaction), even when comparing only the two extreme points  
30  
31 14 (coloured complete faces versus cutout grey-scaled faces). Thus, the present results  
32  
33 15 are in line with approximately a third of the reviewed studies (see Supplementary Table  
34  
35 16 S1), which suggest effects of emotion and naturalness on face processing being  
36  
37 17 relatively independent from one another.  
38  
39  
40  
41  
42

### 43 **Limitations and future directions**

44  
45  
46 19 It has to be noted that we only used fearful and neutral facial expressions, thus, our  
47  
48 20 findings should not be generalised to other emotional expressions. Furthermore, face  
49  
50 21 pictures were presented very briefly (50 ms), which likely precluded a more in-depth  
51  
52 22 elaboration of facial expressions. This might have caused the absence of emotion  
53  
54 23 effects for the LPP component. However, similar to previous studies which used even  
55  
56 24 shorter presentation times (e.g., 8 ms or 20 ms M. L. Smith, 2012; Walentowska &  
57  
58 25 Wronka, 2012), emotional modulations have been observed for the N170 and EPN  
59  
60

1 components. These findings support the notion of spontaneous and rather automatic  
2 selective emotion processing at such early stages of the visual processing stream  
3 (e.g., Schupp et al., 2006). In addition, overall stimulus size might have modulated the  
4 present ERP findings. Specifically, the cutout faces display less information (i.e. no  
5 hair), though this was necessary to avoid changing the size of the core facial features  
6 which are known to strongly impact ERP amplitudes (e.g., eyes, see Li et al., 2018).  
7 Moreover, tiredness or habituation effects might be involved, as participants completed  
8 two other face experiments directly preceding the present study. Whereas previous  
9 research showed that emotional ERP effects are presumably not affected by massive  
10 repetitions (for a review, see Ferrari, Codispoti, & Bradley, 2017), future research may  
11 account for habituation effects regarding facial naturalness. Finally, our manipulation  
12 of face naturalness is not universal, as, for example, various levels of public  
13 concealment of the face are common in different cultures.

14 Future studies may detail whether face naturalness, uniqueness, and realism act  
15 in parallel or interact with facial emotion and/or identity processing. Moreover, the  
16 impact of various levels of attention on the different levels of face naturalness is of  
17 interest and should be examined further. For instance, the present findings of  
18 independent emotion and face naturalness effects may vary depending on whether  
19 people pay attention to faces or whether faces are distractors. By strictly manipulating  
20 both face naturalness as well as perceived uniqueness, the (dis-)similarities of these  
21 concepts could be better understood. This could be achieved, for instance, by  
22 manipulating facial features in real, caricature, or cartoon faces.

## 23 **Conclusion**

24 As the key finding, we showed that emotion ERP effects towards fearful expressions  
25 were not interacting with the most commonly used face naturalness manipulations.

1  
2  
3 1 Although large main effects were observed for facial fear as well as for face naturalness  
4  
5 2 (N170 and EPN component), no interactions were detected for both components.  
6  
7 3 Moreover, face naturalness seems to modulate the N170, EPN and LPP component  
8  
9 4 in a linear fashion, and early components (N170 and EPN) were enlarged for facial  
10  
11 5 stimuli depicting less distracting information (e.g., no hair). In contrast, later processing  
12  
13 6 stages (LPP) were generally enhanced for faces depicting more detailed contextual  
14  
15 7 information. We recommend that researchers interested in strong modulations of early  
16  
17 8 components should make use of cutout grey-scaled faces, while those interested in a  
18  
19 9 pronounced late positivity should use close-up coloured faces providing more realistic  
20  
21  
22  
23  
24 10 information.  
25  
26  
27  
28  
29  
30

## 31 12 **Acknowledgments**

32  
33 13 The authors declared that they had no conflict of interest with respect to their  
34  
35 14 authorship or the publication of this article. We acknowledge support from the Open  
36  
37 15 Access Publication Fund of the University of Muenster. F.B. was supported by the  
38  
39 16 German Research Foundation German Research Foundation (Deutsche  
40  
41 17 Forschungsgemeinschaft; BU 3255/1-1). We thank Josefine Eck and Laura Gutewort  
42  
43 18 for their help with data acquisition, Nele Johanna Bögemann and Julian Koc for their  
44  
45 19 valuable corrections, and all participants contributing to this study.  
46  
47  
48  
49  
50  
51  
52  
53  
54  
55  
56  
57  
58  
59  
60



## REFERENCES

- 1  
2  
3  
4  
5  
6  
7  
8  
9  
10  
11  
12  
13  
14  
15  
16  
17  
18  
19  
20  
21  
22  
23  
24  
25  
26  
27  
28  
29  
30  
31  
32  
33  
34  
35  
36  
37  
38  
39  
40  
41  
42  
43  
44  
45  
46  
47  
48  
49  
50  
51  
52  
53  
54  
55  
56  
57  
58  
59  
60
- 1 Adolphs, R. (2008). Fear, Faces, and the Human Amygdala. *Current Opinion in Neurobiology*, 18(2), 166–172. <https://doi.org/10.1016/j.conb.2008.06.006>
- 2 Allison, T., Puce, A., Spencer, D. D., & McCarthy, G. (1999). Electrophysiological Studies of Human Face Perception. I: Potentials Generated in Occipitotemporal Cortex by Face and Non-face Stimuli. *Cerebral Cortex*, 9(5), 415–430. <https://doi.org/10.1093/cercor/9.5.415>
- 3 Balas, B., & Pacella, J. (2015). Artificial faces are harder to remember. *Computers in Human Behavior*, 52, 331–337. <https://doi.org/10.1016/j.chb.2015.06.018>
- 4 Bentin, S., Allison, T., Puce, A., Perez, E., & McCarthy, G. (1996). Electrophysiological Studies of Face Perception in Humans. *Journal of Cognitive Neuroscience*, 8(6), 551–565. <https://doi.org/10.1162/jocn.1996.8.6.551>
- 5 Bentin, S., Taylor, M. J., Rousselet, G. A., Itier, R. J., Caldara, R., Schyns, P. G., ... Rossion, B. (2007). Controlling interstimulus perceptual variance does not abolish N170 face sensitivity. *Nature Neuroscience*, 10(7), 801–802. <https://doi.org/10.1038/nn0707-801>
- 6 Blechert, J., Sheppes, G., Di Tella, C., Williams, H., & Gross, J. J. (2012). See What You Think: Reappraisal Modulates Behavioral and Neural Responses to Social Stimuli. *Psychological Science*, 23(4), 346–353. <https://doi.org/10.1177/0956797612438559>
- 7 Boremanse, A., Norcia, A. M., & Rossion, B. (2013). An objective signature for visual binding of face parts in the human brain. *Journal of Vision*, 13(11), 6–6. <https://doi.org/10.1167/13.11.6>
- 8 Brenner, C. A., Rumak, S. P., Burns, A. M. N., & Kieffaber, P. D. (2014). The role of encoding and attention in facial emotion memory: An EEG investigation.

- 1  
2  
3 1 *International Journal of Psychophysiology*, 93(3), 398–410.  
4  
5 2 <https://doi.org/10.1016/j.ijpsycho.2014.06.006>  
6  
7 3 Bublatzky, F., Gerdes, A. B. M., White, A. J., Riemer, M., & Alpers, G. W. (2014).  
8 4 Social and emotional relevance in face processing: happy faces of future  
9 5 interaction partners enhance the late positive potential. *Frontiers in Human*  
10 6 *Neuroscience*, 8. <https://doi.org/10.3389/fnhum.2014.00493>  
11  
12 7 Bublatzky, F., Pittig, A., Schupp, H. T., & Alpers, G. W. (2017). Face-to-face:  
13 8 Perceived personal relevance amplifies face processing. *Social Cognitive and*  
14 9 *Affective Neuroscience*, 12(5), 811–822. <https://doi.org/10.1093/scan/nsx001>  
15  
16 10 Bublatzky, F., & Schupp, H. T. (2012). Pictures cueing threat: Brain dynamics in  
17 11 viewing explicitly instructed danger cues. *Social Cognitive and Affective*  
18 12 *Neuroscience*, 7, 611–622.  
19  
20 13 Calder, A. J., & Young, A. W. (2005). Understanding the recognition of facial identity  
21 14 and facial expression. *Nature Reviews Neuroscience*, 6(8), 641–651.  
22 15 <https://doi.org/10.1038/nrn1724>  
23  
24 16 Calvo, M. G., Marrero, H., & Beltrán, D. (2013). When does the brain distinguish  
25 17 between genuine and ambiguous smiles? An ERP study. *Brain and Cognition*,  
26 18 81(2), 237–246. <https://doi.org/10.1016/j.bandc.2012.10.009>  
27  
28 19 Eimer, M. (2011). The Face-Sensitive N170 Component of the Event-Related Brain  
29 20 Potential. <https://doi.org/10.1093/oxfordhb/9780199559053.013.0017>  
30  
31 21 Ferrari, V., Codispoti, M., & Bradley, M. M. (2017). Repetition and ERPs during  
32 22 emotional scene processing: a selective review. *International Journal of*  
33 23 *Psychophysiology*, 111, 170–177.  
34  
35 24 Foti, D., Olvet, D. M., Klein, D. N., & Hajcak, G. (2010). Reduced electrocortical  
36 25 response to threatening faces in major depressive disorder. *Depression and*  
37 26 *Anxiety*, 27(9), 813–820. <https://doi.org/10.1002/da.20712>

- 1  
2  
3 1 Ganis, G., Smith, D., & Schendan, H. E. (2012). The N170, not the P1, indexes the  
4  
5 2 earliest time for categorical perception of faces, regardless of interstimulus  
6  
7 3 variance. *NeuroImage*, 62(3), 1563–1574.  
8  
9  
10 4 <https://doi.org/10.1016/j.neuroimage.2012.05.043>  
11  
12 5 Goffaux, V., Jemel, B., Jacques, C., Rossion, B., & Schyns, P. G. (2003). ERP  
13  
14 6 evidence for task modulations on face perceptual processing at different  
15  
16 7 spatial scales. *Cognitive Science*, 27(2), 313–325.  
17  
18 8 [https://doi.org/10.1207/s15516709cog2702\\_8](https://doi.org/10.1207/s15516709cog2702_8)  
19  
20 9 González, I. Q., León, M. A. B., Belin, P., Martínez-Quintana, Y., García, L. G., &  
21  
22 10 Castillo, M. S. (2011). Person identification through faces and voices: An ERP  
23  
24 11 study. *Brain Research*, 1407, 13–26.  
25  
26 12 <https://doi.org/10.1016/j.brainres.2011.03.029>  
27  
28 13 Hajcak, G., Dunning, J. P., & Foti, D. (2009). Motivated and controlled attention to  
29  
30 14 emotion: time-course of the late positive potential. *Clinical Neurophysiology :*  
31  
32 15 *Official Journal of the International Federation of Clinical Neurophysiology*,  
33  
34 16 120(3), 505–510. <https://doi.org/10.1016/j.clinph.2008.11.028>  
35  
36 17 Haxby, J. V., Hoffman, E. A., & Gobbini, M. I. (2000). The distributed human neural  
37  
38 18 system for face perception. *Trends in Cognitive Sciences*, 4(6), 223–233.  
39  
40 19 [https://doi.org/10.1016/S1364-6613\(00\)01482-0](https://doi.org/10.1016/S1364-6613(00)01482-0)  
41  
42 20 Hedger, N., Adams, W. J., & Garner, M. (2015). Fearful faces have a sensory  
43  
44 21 advantage in the competition for awareness. *Journal of Experimental*  
45  
46 22 *Psychology: Human Perception and Performance*, 41(6), 1748.  
47  
48 23 Herbert, C., Sfaerlea, A., & Blumenthal, T. (2013). Your emotion or mine: labeling  
49  
50 24 feelings alters emotional face perception—an ERP study on automatic and  
51  
52 25 intentional affect labeling. *Frontiers in Human Neuroscience*, 7.  
53  
54 26 <https://doi.org/10.3389/fnhum.2013.00378>  
55  
56  
57  
58  
59  
60

- 1  
2  
3 1 Hinojosa, J. A., Mercado, F., & Carretié, L. (2015). N170 sensitivity to facial  
4  
5 2 expression: A meta-analysis. *Neuroscience and Biobehavioral Reviews*, *55*,  
6  
7 3 498–509. <https://doi.org/10.1016/j.neubiorev.2015.06.002>  
8  
9  
10 4 Ille, N., Berg, P., & Scherg, M. (2002). Artifact correction of the ongoing EEG using  
11  
12 5 spatial filters based on artifact and brain signal topographies. *Journal of*  
13  
14 6 *Clinical Neurophysiology: Official Publication of the American*  
15  
16 7 *Electroencephalographic Society*, *19*(2), 113–124.  
17  
18  
19 8 Itier, R. J., & Neath-Tavares, K. N. (2017). Effects of task demands on the early  
20  
21 9 neural processing of fearful and happy facial expressions. *Brain Research*,  
22  
23 10 1663, 38–50. <https://doi.org/10.1016/j.brainres.2017.03.013>  
24  
25  
26 11 Itier, R. J., & Taylor, M. J. (2004). N170 or N1? Spatiotemporal Differences between  
27  
28 12 Object and Face Processing Using ERPs. *Cerebral Cortex*, *14*(2), 132–142.  
29  
30 13 <https://doi.org/10.1093/cercor/bhg111>  
31  
32  
33 14 Itier, R. J., Van Roon, P., & Alain, C. (2011). Species sensitivity of early face and eye  
34  
35 15 processing. *NeuroImage*, *54*(1), 705–713.  
36  
37 16 <https://doi.org/10.1016/j.neuroimage.2010.07.031>  
38  
39  
40 17 Itz, M. L., Schweinberger, S. R., Schulz, C., & Kaufmann, J. M. (2014). Neural  
41  
42 18 correlates of facilitations in face learning by selective caricaturing of facial  
43  
44 19 shape or reflectance. *NeuroImage*, *102 Pt 2*, 736–747.  
45  
46 20 <https://doi.org/10.1016/j.neuroimage.2014.08.042>  
47  
48  
49 21 Jack, R. E., & Schyns, P. G. (2015). The Human Face as a Dynamic Tool for Social  
50  
51 22 Communication. *Current Biology*, *25*(14), R621–R634.  
52  
53 23 <https://doi.org/10.1016/j.cub.2015.05.052>  
54  
55  
56 24 Jacques, C., & Rossion, B. (2007). Early electrophysiological responses to multiple  
57  
58 25 face orientations correlate with individual discrimination performance in  
59  
60

- 1  
2  
3 1 humans. *NeuroImage*, 36(3), 863–876.  
4  
5 2 <https://doi.org/10.1016/j.neuroimage.2007.04.016>  
6  
7  
8 3 Joyce, C., & Rossion, B. (2005). The face-sensitive N170 and VPP components  
9  
10 4 manifest the same brain processes: The effect of reference electrode site.  
11  
12 5 *Clinical Neurophysiology*, 116(11), 2613–2631.  
13  
14 6 <https://doi.org/10.1016/j.clinph.2005.07.005>  
15  
16  
17 7 Kaufmann, J. M., & Schweinberger, S. R. (2008). Distortions in the brain? ERP  
18  
19 8 effects of caricaturing familiar and unfamiliar faces. *Brain Research*, 1228,  
20  
21 9 177–188. <https://doi.org/10.1016/j.brainres.2008.06.092>  
22  
23  
24 10 Langner, O., Dotsch, R., Bijlstra, G., Wigboldus, D. H. J., Hawk, S. T., &  
25  
26 11 Knippenberg, A. van. (2010). Presentation and validation of the Radboud  
27  
28 12 Faces Database. *Cognition and Emotion*, 24(8), 1377–1388.  
29  
30 13 <https://doi.org/10.1080/02699930903485076>  
31  
32  
33 14 Latinus, M., & Taylor, M. J. (2006). Face processing stages: Impact of difficulty and  
34  
35 15 the separation of effects. *Brain Research*, 1123(1), 179–187.  
36  
37 16 <https://doi.org/10.1016/j.brainres.2006.09.031>  
38  
39  
40 17 Li, S., Li, P., Wang, W., Zhu, X., & Luo, W. (2018). The effect of emotionally valenced  
41  
42 18 eye region images on visuocortical processing of surprised faces.  
43  
44 19 *Psychophysiology*, 55(5), e13039. <https://doi.org/10.1111/psyp.13039>  
45  
46  
47 20 Luo, W., Feng, W., He, W., Wang, N. Y., & Luo, Y. J. (2010). Three stages of facial  
48  
49 21 expression processing: ERP study with rapid serial visual presentation.  
50  
51 22 *NeuroImage*, 49, 1857–1867.  
52  
53  
54 23 Mangun, G. R., & Hillyard, S. A. (1991). Modulations of sensory-evoked brain  
55  
56 24 potentials indicate changes in perceptual processing during visual-spatial  
57  
58 25 priming. *Journal of Experimental Psychology: Human Perception and*  
59  
60 26 *Performance*, 17, 1057–1074.

- 1  
2  
3 1 Morel, S., George, N., Foucher, A., Chammat, M., & Dubal, S. (2014). ERP evidence  
4  
5 2 for an early emotional bias towards happy faces in trait anxiety. *Biological*  
6  
7 3 *Psychology*, 99, 183–192. <https://doi.org/10.1016/j.biopsycho.2014.03.011>  
8  
9  
10 4 Müller-Bardorff, M., Bruchmann, M., Mothes-Lasch, M., Zwitterlood, P.,  
11  
12 5 Schlossmacher, I., Hofmann, D., ... Straube, T. (2018). Early brain responses  
13  
14 6 to affective faces: A simultaneous EEG-fMRI study. *NeuroImage*, 178, 660–  
15  
16 7 667. <https://doi.org/10.1016/j.neuroimage.2018.05.081>  
17  
18  
19 8 Peltola, M. J., Yrttiaho, S., Puura, K., Proverbio, A. M., Mononen, N., Lehtimäki, T., &  
20  
21 9 Leppänen, J. M. (2014). Motherhood and oxytocin receptor genetic variation  
22  
23 10 are associated with selective changes in electrocortical responses to infant  
24  
25 11 facial expressions. *Emotion*, 14(3), 469.  
26  
27  
28 12 Peyk, P., De Cesarei, A., & Junghöfer, M. (2011). Electro Magneto Encephalography  
29  
30 13 Software: overview and integration with other EEG/MEG toolboxes.  
31  
32 14 *Computational Intelligence and Neuroscience*, Volume 2011, Article ID  
33  
34 15 861705(2011:861705), 1–11.  
35  
36  
37 16 Prete, G., Capotosto, P., Zappasodi, F., Laeng, B., & Tommasi, L. (2015). The  
38  
39 17 cerebral correlates of subliminal emotions: an electroencephalographic study  
40  
41 18 with emotional hybrid faces. *European Journal of Neuroscience*, 42(11),  
42  
43 19 2952–2962. <https://doi.org/10.1111/ejn.13078>  
44  
45  
46 20 Rellecke, J., Sommer, W., & Schacht, A. (2012). Does processing of emotional facial  
47  
48 21 expressions depend on intention? Time-resolved evidence from event-related  
49  
50 22 brain potentials. *Biological Psychology*, 90(1), 23–32.  
51  
52  
53 23 Righi, S., Marzi, T., Toscani, M., Baldassi, S., Ottonello, S., & Viggiano, M. P. (2012).  
54  
55 24 Fearful expressions enhance recognition memory: Electrophysiological  
56  
57 25 evidence. *Acta Psychologica*, 139(1), 7–18.  
58  
59 26 <https://doi.org/10.1016/j.actpsy.2011.09.015>  
60

- 1  
2  
3 1 Rossion, B., & Jacques, C. (2008). Does physical interstimulus variance account for  
4  
5 2 early electrophysiological face sensitive responses in the human brain? Ten  
6  
7 3 lessons on the N170. *NeuroImage*, 39(4), 1959–1979.  
8  
9  
10 4 <https://doi.org/10.1016/j.neuroimage.2007.10.011>  
11  
12 5 Sagiv, N., & Bentin, S. (2001). Structural encoding of human and schematic faces:  
13  
14 6 holistic and part-based processes. *Journal of Cognitive Neuroscience*, 13(7),  
15  
16 7 937–951. <https://doi.org/10.1162/089892901753165854>  
17  
18  
19 8 Schendan, H. E., & Ganis, G. (2013). Face-specificity is robust across diverse stimuli  
20  
21 9 and individual people, even when interstimulus variance is zero.  
22  
23 10 *Psychophysiology*, 50(3), 287–291. <https://doi.org/10.1111/psyp.12013>  
24  
25  
26 11 Schindler, S., Schettino, A., & Pourtois, G. (2018). Electrophysiological correlates of  
27  
28 12 the interplay between low-level visual features and emotional content during  
29  
30 13 word reading. *Scientific Reports*, 8(1), 12228. [https://doi.org/10.1038/s41598-](https://doi.org/10.1038/s41598-018-30701-5)  
31  
32 14 [018-30701-5](https://doi.org/10.1038/s41598-018-30701-5)  
33  
34  
35 15 Schindler, S., Zell, E., Botsch, M., & Kissler, J. (2017). Differential effects of face-  
36  
37 16 realism and emotion on event-related brain potentials and their implications for  
38  
39 17 the uncanny valley theory. *Scientific Reports*, 7, 45003.  
40  
41 18 <https://doi.org/10.1038/srep45003>  
42  
43  
44 19 Schulz, C., Kaufmann, J. M., Kurt, A., & Schweinberger, S. R. (2012). Faces forming  
45  
46 20 traces: neurophysiological correlates of learning naturally distinctive and  
47  
48 21 caricatured faces. *NeuroImage*, 63(1), 491–500.  
49  
50 22 <https://doi.org/10.1016/j.neuroimage.2012.06.080>  
51  
52  
53 23 Schupp, H. T., Flaisch, T., Stockburger, J., & Junghöfer, M. (2006). Chapter 2  
54  
55 24 Emotion and attention: event-related brain potential studies. *Progress in Brain*  
56  
57 25 *Research*. [https://doi.org/10.1016/S0079-6123\(06\)56002-9](https://doi.org/10.1016/S0079-6123(06)56002-9)  
58  
59  
60

- 1  
2  
3 1 Schupp, H. T., Öhman, A., Junghöfer, M., Weike, A. I., Stockburger, J., & Hamm, A.  
4  
5 2 O. (2004). The Facilitated Processing of Threatening Faces: An ERP Analysis.  
6  
7 3 *Emotion*, 4(2), 189–200. <https://doi.org/10.1037/1528-3542.4.2.189>  
8  
9  
10 4 Schweinberger, S. R., & Neumann, M. F. (2016). Repetition effects in human ERPs  
11  
12 5 to faces. *Cortex*, 80(Supplement C), 141–153.  
13  
14 6 <https://doi.org/10.1016/j.cortex.2015.11.001>  
15  
16  
17 7 Smith, E., Weinberg, A., Moran, T., & Hajcak, G. (2013). Electrocortical responses to  
18  
19 8 NIMSTIM facial expressions of emotion. *International Journal of*  
20  
21 9 *Psychophysiology*, 88(1), 17–25.  
22  
23 10 <https://doi.org/10.1016/j.ijpsycho.2012.12.004>  
24  
25  
26 11 Smith, M. L. (2012). Rapid Processing of Emotional Expressions without Conscious  
27  
28 12 Awareness. *Cerebral Cortex*, 22(8), 1748–1760.  
29  
30 13 <https://doi.org/10.1093/cercor/bhr250>  
31  
32  
33 14 Thierry, G., Martin, C. D., Downing, P. E., & Pegna, A. J. (2007a). Is the N170  
34  
35 15 sensitive to the human face or to several intertwined perceptual and  
36  
37 16 conceptual factors? *Nature Neuroscience*, 10(7), 802.  
38  
39  
40 17 Thierry, G., Martin, C. D., Downing, P., & Pegna, A. J. (2007b). Controlling for  
41  
42 18 interstimulus perceptual variance abolishes N170 face selectivity. *Nature*  
43  
44 19 *Neuroscience*, 10(4), 505–511. <https://doi.org/10.1038/nn1864>  
45  
46  
47 20 Thom, N., Knight, J., Dishman, R., Sabatinelli, D., Johnson, D. C., & Clementz, B.  
48  
49 21 (2013). Emotional scenes elicit more pronounced self-reported emotional  
50  
51 22 experience and greater EPN and LPP modulation when compared to  
52  
53 23 emotional faces. *Cognitive, Affective, & Behavioral Neuroscience*, 14(2), 849–  
54  
55 24 860. <https://doi.org/10.3758/s13415-013-0225-z>  
56  
57  
58  
59  
60



- 1  
2  
3 1 Tsao, D. Y., & Livingstone, M. S. (2008). Mechanisms of face perception. *Annual*  
4  
5 2 *Review of Neuroscience*, 31, 411–437.  
6  
7 3 <https://doi.org/10.1146/annurev.neuro.30.051606.094238>  
8  
9  
10 4 Vogel, E. K., & Luck, S. J. (2000). The visual N1 component as an index of a  
11  
12 5 discrimination process. *Psychophysiology*, 37, 190–203.  
13  
14 6 Walentowska, W., & Wronka, E. (2012). Trait anxiety and involuntary processing of  
15  
16 7 facial emotions. *International Journal of Psychophysiology*, 85(1), 27–36.  
17  
18 8 <https://doi.org/10.1016/j.ijpsycho.2011.12.004>  
19  
20  
21 9 Wegrzyn, M., Bruckhaus, I., & Kissler, J. (2015). Categorical Perception of Fear and  
22  
23 10 Anger Expressions in Whole, Masked and Composite Faces. *PLOS ONE*,  
24  
25 11 10(8), e0134790. <https://doi.org/10.1371/journal.pone.0134790>  
26  
27  
28 12 Wieser, M. J., & Brosch, T. (2012). Faces in context: a review and systematization of  
29  
30 13 contextual influences on affective face processing. *Frontiers in Psychology*, 3,  
31  
32 14 471. <https://doi.org/10.3389/fpsyg.2012.00471>  
33  
34  
35 15 Wieser, M. J., Gerdes, A. B. M., Greiner, R., Reicherts, P., & Pauli, P. (2012). Tonic  
36  
37 16 pain grabs attention, but leaves the processing of facial expressions intact—  
38  
39 17 Evidence from event-related brain potentials. *Biological Psychology*, 90(3),  
40  
41 18 242–248. <https://doi.org/10.1016/j.biopsycho.2012.03.019>  
42  
43  
44 19 Wieser, M. J., & Keil, A. (2013). Fearful faces heighten the cortical representation of  
45  
46 20 contextual threat. *NeuroImage*, 8119, 01019-7.  
47  
48 21 <https://doi.org/10.1016/j.neuroimage.2013.10.008>  
49  
50  
51 22 Wieser, M. J., Pauli, P., Reicherts, P., & Mühlberger, A. (2010). Don't look at me in  
52  
53 23 anger! Enhanced processing of angry faces in anticipation of public speaking.  
54  
55 24 *Psychophysiology*, 47, 271–280.  
56  
57  
58  
59  
60

1  
2  
3  
4  
5  
6  
7  
8  
9  
10  
11  
12  
13  
14  
15  
16  
17  
18  
19  
20  
21  
22  
23  
24  
25  
26  
27  
28  
29  
30  
31  
32  
33  
34  
35  
36  
37  
38  
39  
40  
41  
42  
43  
44  
45  
46  
47  
48  
49  
50  
51  
52  
53  
54  
55  
56  
57  
58  
59  
60

1 Yuan, L., Zhou, R., & Hu, S. (2014). Cognitive reappraisal of facial expressions:  
2 Electrophysiological evidence of social anxiety. *Neuroscience Letters*, 577,  
3 45–50.  
4  
5

For Peer Review

## 1 **Figure Legends**

2 **Figure 1: Example facial stimuli showing fearful and neutral expressions.** Please  
3 note that background colour was identical in all experiments and displayed facial  
4 features size (e.g. eyes, nose, and mouth) was kept constant.

5  
6 **Figure 2: P1 modulations by depicted face naturalness.** The left panel shows the  
7 time course for all face naturalness conditions, averaged over electrodes O1, Oz, O2.  
8 The right panel shows the amplitudes for each face naturalness condition. P1  
9 amplitudes did not significantly differ between the naturalness levels. All difference  
10 plots (blue) contain 95% bootstrap confidence intervals of intra-individual differences.

11  
12 **Figure 3: Emotion effects for the N170 and EPN components. a and b)** Difference  
13 topographies, showing enhanced negativity for fearful faces over occipital areas. **c and**  
14 **d)** The time course for main effects of emotions at electrodes PO7 and PO8. **e and f)**  
15 Time course for all conditions, showing similar emotion increases at electrodes PO7  
16 and PO8. All difference plots (blue) contain 95% bootstrap confidence intervals of intra-  
17 individual differences.

18  
19 **Figure 4: Naturalness effects for the N170, EPN and LPP components. a and b)**  
20 display the time course for electrodes PO7, PO8, respectively. **c and d)** show the  
21 topographies for each face naturalness level in the EPN and LPP interval, respectively,  
22 indicating stronger negativity and lower positivity for decreasing face naturalness. **e**  
23 **and f)** display time courses and topographies for the LPP component. All difference  
24 plots (blue) contain 95% bootstrap confidence intervals of intra-individual differences.

1  
2  
3  
4  
5  
6  
7  
8  
9  
10  
11  
12  
13  
14  
15  
16  
17  
18  
19  
20  
21  
22  
23  
24  
25  
26  
27  
28  
29  
30  
31  
32  
33  
34  
35  
36  
37  
38  
39  
40  
41  
42  
43  
44  
45  
46  
47  
48  
49  
50  
51  
52  
53  
54  
55  
56  
57  
58  
59  
60

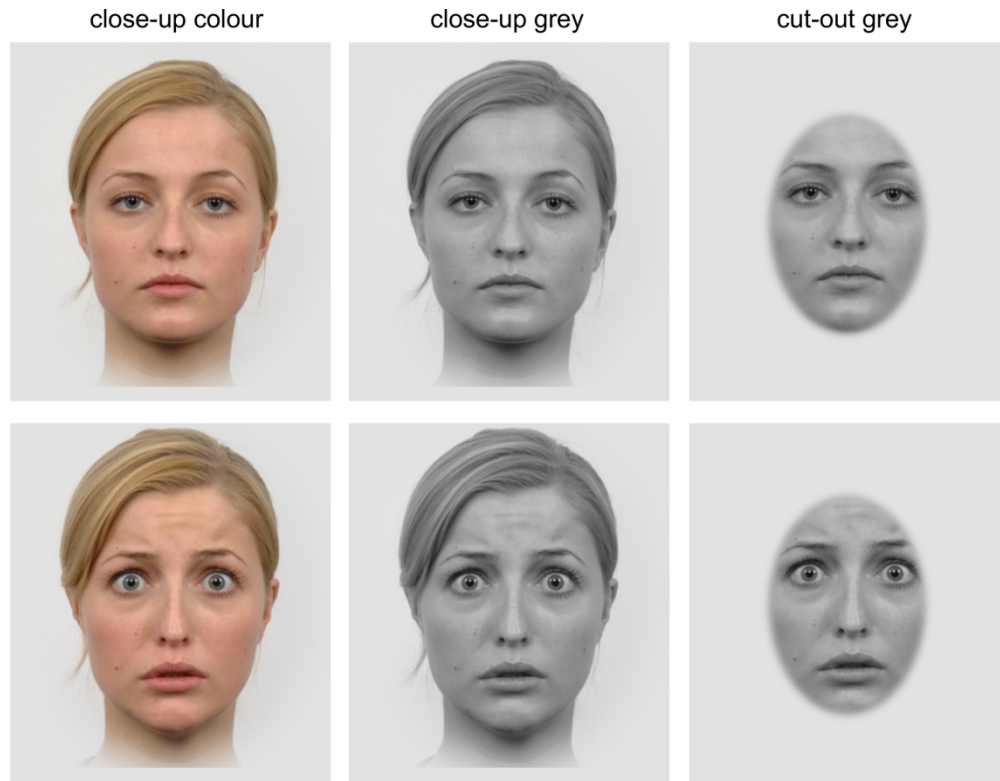

Figure 1: Example facial stimuli showing fearful and neutral expressions. Please note that background colour was identical in all experiments and displayed facial features size (e.g. eyes, nose, and mouth) was kept constant.

165x127mm (300 x 300 DPI)

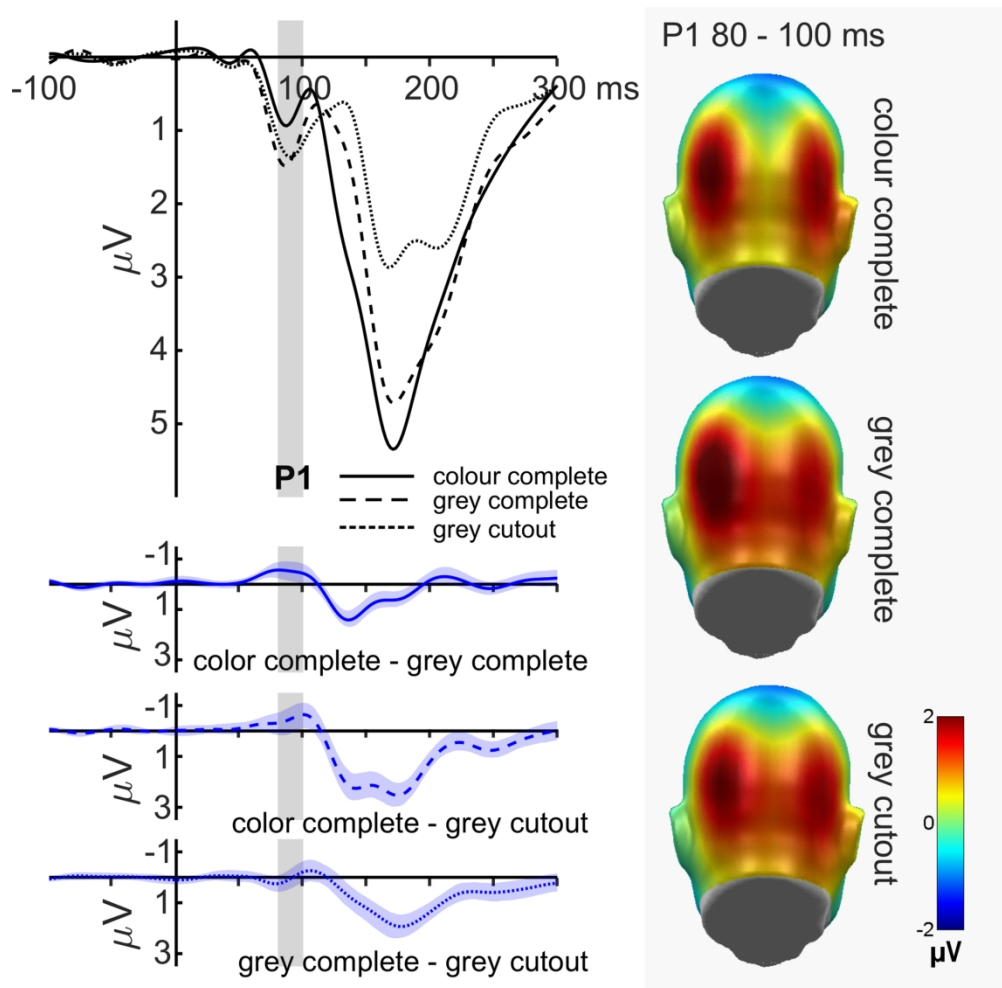

Figure 2: P1 modulations by depicted face naturalness. The Left panel shows the the time course for all face naturalness conditions, averaged over electrodes O1, Oz, and O2. The right panel shows the amplitudes for each face naturalness conditions. P1 amplitudes did not significantly differ between the naturalness levels. All difference plots (blue) contain 95% bootstrap confidence intervals of intra-individual differences.

184x182mm (300 x 300 DPI)

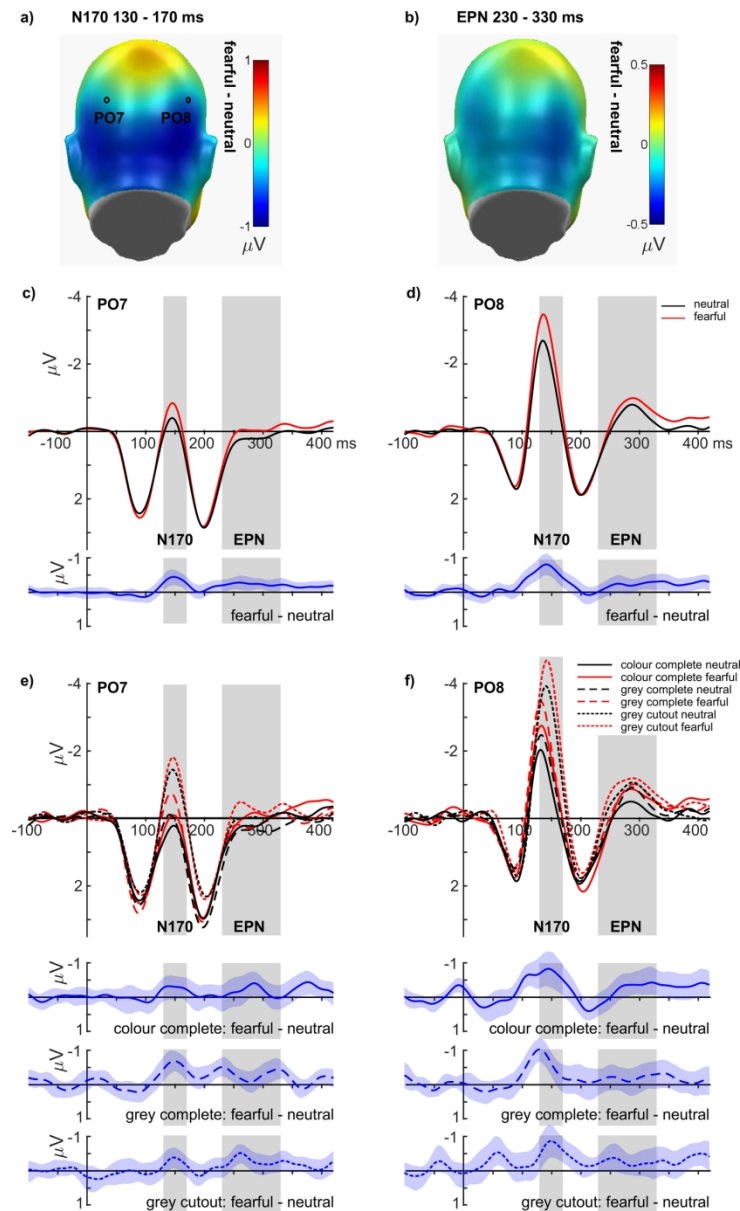

Figure 3: Emotion effects for the N170 and EPN components. a and b) Difference topographies, showing enhanced negativity for fearful faces over occipital areas. c and d) The time course for main effects of emotions at electrodes PO7 and PO8. e and f) Time course for all conditions, showing similar emotion increases at electrodes PO7 and PO8. All difference plots (blue) contain 95% bootstrap confidence intervals of intra-individual differences.

133x219mm (300 x 300 DPI)

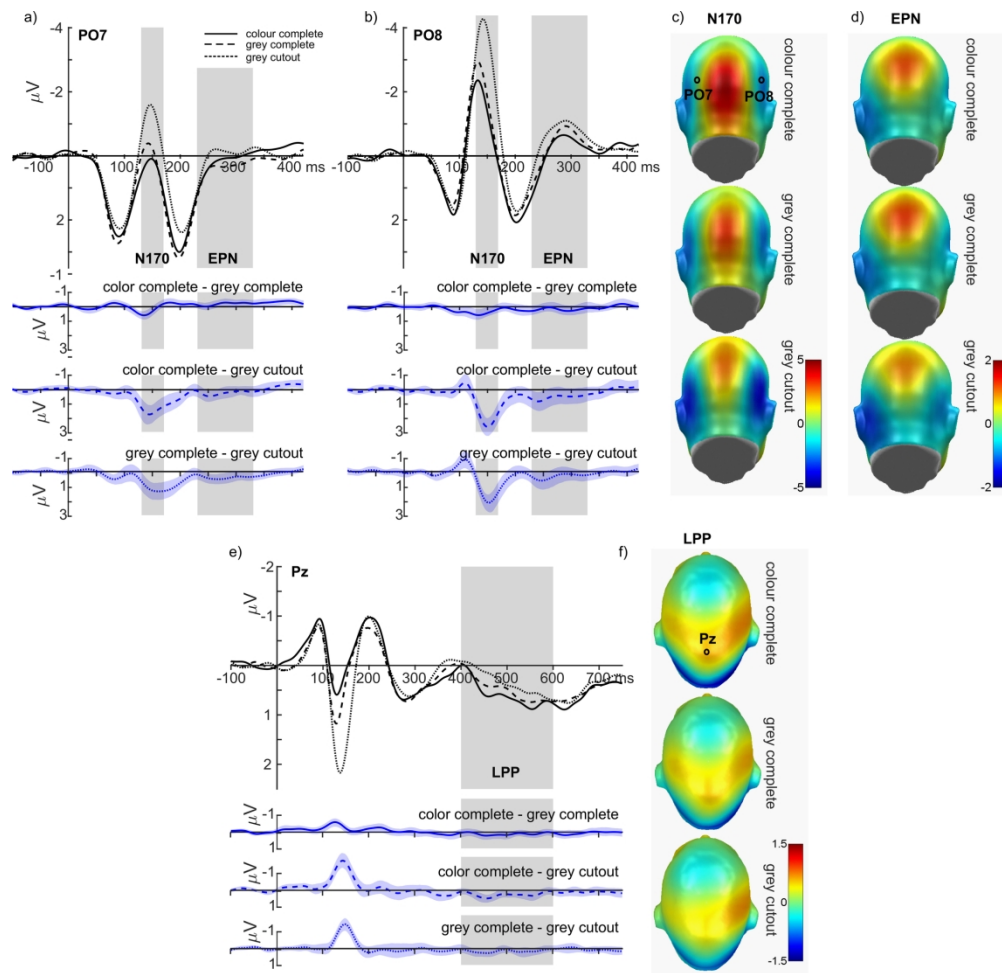

Figure 4: Naturalness effects for the N170, EPN and LPP components. a and b) display the time course for electrodes PO7, PO8, respectively. c and d) show the topographies for each face naturalness level in the EPN and LPP interval, respectively, indicating stronger negativity and lower positivity for decreasing face naturalness. e and f) display time courses and topographies for the LPP component. All difference plots (blue) contain 95% bootstrap confidence intervals of intra-individual differences.

192x185mm (300 x 300 DPI)

1  
2  
3 1 **Modulation of face- and emotion-selective ERPs by the three most**  
4  
5  
6 2 **common types of face image manipulations**  
7  
8

9 3 —  
10

11 4 **Supplementary Materials**  
12  
13  
14  
15 5

16  
17 6 Sebastian Schindler<sup>1\*</sup>, Maximilian Bruchmann<sup>1</sup>, Florian Bublitzky<sup>2</sup>, and Thomas  
18  
19 7 Straube<sup>1</sup>  
20  
21

22 8  
23  
24 9 <sup>1</sup> Institute of Medical Psychology and Systems Neuroscience, University of Muenster

25 10 <sup>2</sup> Central Institute of Mental Health Mannheim, Medical Faculty Mannheim/Heidelberg  
26  
27 11 University, Mannheim, Germany  
28  
29 12

30 13 \* Corresponding author  
31  
32 14  
33  
34  
35 15  
36

37 16 **Correspondence address**  
38

39 17 Institute of Medical Psychology and Systems Neuroscience  
40 18 University of Münster  
41 19 Von-Esmarch-Str. 52, D-48149 Münster, Germany  
42 20 e-mail: sebastian.schindler@ukmuenster.de  
43  
44  
45  
46 21  
47  
48  
49  
50  
51  
52  
53  
54  
55  
56  
57  
58  
59  
60



Supplementary Materials: Modulation of face- and emotion-selective ERPs by the three most common  
types of face image manipulations

## 1. Overview of the complete data and electrode clusters

According to the pre-registration, we initially scored the P1 from 80 to 100 over an occipital cluster (O1, Oz, O2, PO7, PO8). While visual inspection suggest that the P1 was most pronounced visible over two more lateralized clusters (left: P9, P7, PO7; right: P10, P8, PO8; see Supplementary Figure S1), using these electrodes did not change any observed result for the P1. A final explorative analyses only used medial electrodes (O1, Oz, O2). Similarly, the N170 and EPN over more lateral, temporo-occipital clusters were examined (left: P9, P7, PO7; right: P10, P8, PO8), which had no effect on the results. In contrast to the pre-registered hypotheses, the LPP was observed to be pronounced over centro-parietal, rather than parieto-occipital regions, accordingly, we therefore shifted the sensors of interest to a more centro-parietal locations (CP1, CPz, CP2, P1, Pz, P2; see Supplementary Figure S1).

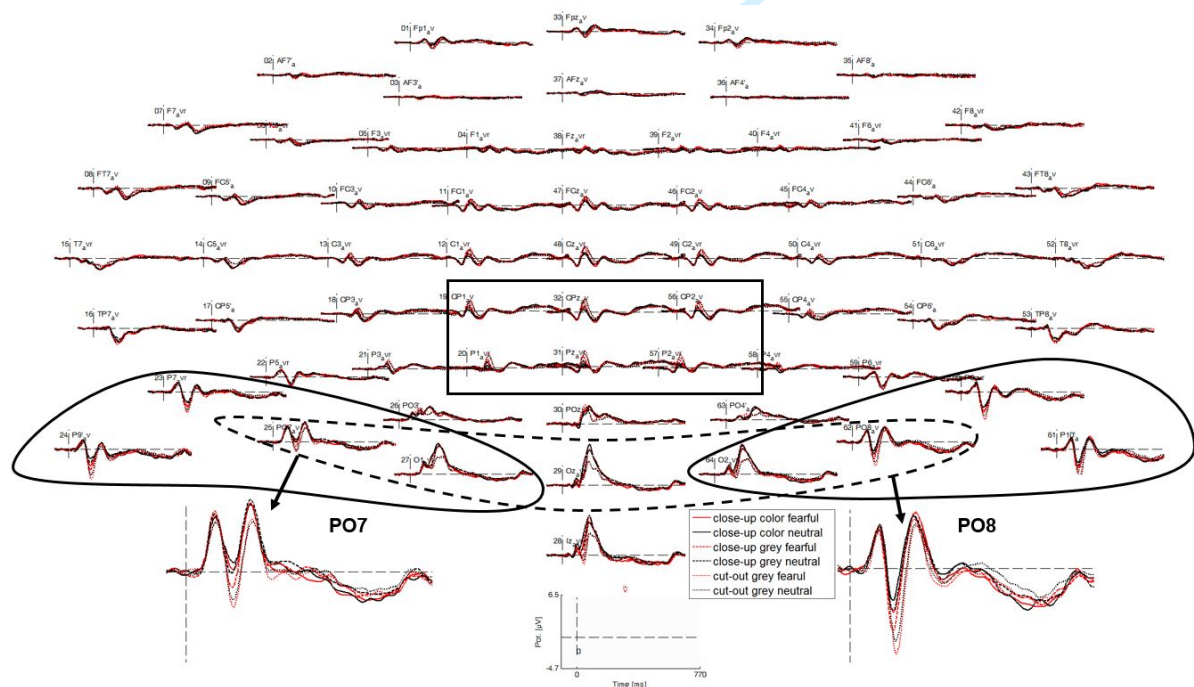

**Supplementary Figure S1: Overview for all electrodes and all conditions.** Highlighted are all used electrode clusters. The dashed lines include the occipital P1

Supplementary Materials: Modulation of face- and emotion-selective ERPs by the three most common types of face image manipulations

1 cluster, the straight black circles the two occipito-temporal N170/EPN clusters, and the  
2 black rectangle the centro-parietal LPP cluster. Electrodes PO7 and PO8 are  
3 superimposed to show the differential effects of each condition.

## 4 2. Additional explorative ERP analyses

### 5 P1 face naturalness main effects

6 As described in the main text, in addition to the medial electrodes (O1, Oz, O2),  
7 showing the expected P1 modulations, we performed explorative analyses of lateral  
8 sensors. As the collapsed localizer suggests that over lateral regions the absolute P1  
9 seem to be largest (see Supplementary Figure S1), additionally, a re-analyses with  
10 more lateralized electrode clusters were performed for the P1 between 80 and 100ms,  
11 to better cover possible P1 modulations (left: P9, P7, PO7, O1; right: P10, P8, PO8,  
12 O2). However, this neither revealed a P1 main effect of emotion ( $F_{(1,35)} = 0.55$ ,  $p =$   
13  $.463$ , partial  $\eta^2 = .015$ ), nor an effect of naturalness ( $F_{(2,70)} = 0.34$ ,  $p = .716$ , partial  $\eta^2 =$   
14  $.010$ ), as well as no interaction between emotion and face naturalness ( $F_{(2,70)} = 0.11$ ,  
15  $p = .893$ , partial  $\eta^2 = .003$ ).

### 16 P1, N170, and EPN effects of laterality

17 For the P1, using lateralized electrode clusters (left: P9, P7, PO7, O1; right: P10, P8,  
18 PO8, O2), no main effect of laterality was emerged ( $F_{(1,35)} = 1.10$ ,  $p = .302$ , partial  $\eta^2 =$   
19  $.030$ ). There was no interaction of laterality with emotion ( $F_{(1,35)} = 0.54$ ,  $p = .466$ , partial  
20  $\eta^2 = .015$ ), or with face naturalness ( $F_{(2,70)} = 0.11$ ,  $p = .893$ , partial  $\eta^2 = .003$ ), as well  
21 as no triple interaction ( $F_{(2,70)} = 0.03$ ,  $p = .970$ , partial  $\eta^2 = .001$ ). For the N170, again  
22 no main effect of laterality was found ( $F_{(1,35)} = 2.03$ ,  $p = .163$ , partial  $\eta^2 = .055$ ). There  
23 was no interaction of laterality with emotion ( $F_{(1,35)} = 0.37$ ,  $p = .547$ , partial  $\eta^2 = .010$ ),  
24 or with face naturalness ( $F_{(1,67,58,29)} = 1.70$ ,  $p = .197$ , partial  $\eta^2 = .046$ ), as well as no  
25 triple interaction ( $F_{(2,70)} = 0.74$ ,  $p = .483$ , partial  $\eta^2 = .021$ ). For the EPN, similarly, no

Supplementary Materials: Modulation of face- and emotion-selective ERPs by the three most common types of face image manipulations

1 main effect of laterality was found ( $F_{(1,35)} = 0.12, p = .729, \text{partial } \eta^2 = .003$ ). There was  
2 no interaction of laterality with emotion ( $F_{(1,35)} = 0.02, p = .897, \text{partial } \eta^2 < .001$ ), or  
3 with face naturalness ( $F_{(2,70)} = 0.64, p = .531, \text{partial } \eta^2 = .018$ ), as well as no triple  
4 interaction ( $F_{(2,70)} = 0.06, p = .940, \text{partial } \eta^2 = .002$ ).

### 5 **3. Overview of used face stimuli in the recent literature**

6 Reviewing the last decade (2008 until 2018) of ERP research on emotional face  
7 processing, a relatively heterogeneous use of facial stimuli was found. For a review  
8 not related to the topic of this paper, a literature search for relevant studies was done  
9 with electronic search engines, data bases (i.e., PubMed®, Google Scholar®), and the  
10 reference lists of related reviews (e.g., Hinojosa et al., 2015). The search depicted the  
11 terms "ERP" AND "face" AND "emotion" resulting in 599 matches in PubMed, as well  
12 as with the terms "ERP" AND "emotional face processing" AND "attention to emotion"  
13 resulting in 200 matches in Google Scholar, performed in May 2018. Next, studies  
14 were independently reviewed regarding inclusion criteria by the authors. A table of 101  
15 studies is shown in supplementary Table S1, showing the kind used faces and  
16 literature reference. Please note that cutout faces vary considerably across different  
17 studies. For instance, some studies used oval or rectangle shapes depicting more or  
18 less of facial hair and/or other features (e.g. the neck). Most studies used close-up  
19 coloured faces (28), close-up grey-scaled faces (22) or cutout grey-scaled faces (27),  
20 while a large number of studies use cutout coloured faces as well (11). The remaining  
21 studies either used schematic face stimuli (3, close-up or cutout grey-scaled faces),  
22 artificial faces (4, close-up or cutout colour faces), or could not clearly assigned (1  
23 showing full body postures, 1 varying background colour, 3 with no clear face colour /  
24 size definition retrieved).

## Supplementary Materials: Modulation of face- and emotion-selective ERPs by the three most common types of face image manipulations

**Supplementary Table S1. Review of 100 recently published ERP studies using emotional and neutral faces**

| <b>Used facial stimuli</b>                 | <b>Reference</b>                                                                                                                                                                                                                                                                                    |
|--------------------------------------------|-----------------------------------------------------------------------------------------------------------------------------------------------------------------------------------------------------------------------------------------------------------------------------------------------------|
| cutout coloured faces                      | Aarts & Pourtois (2012) Anxiety disrupts the evaluative component of performance monitoring: An ERP study. <i>Neuropsychologia</i>                                                                                                                                                                  |
| cutout grey-scaled faces                   | Aguado, L., Valdés-Conroy, V., Rodríguez, S., Román, F. J., Diéguez-Risco, T., & Fernández-Cahill, M. (2012). Modulation of early perceptual processing by emotional expression and acquired valence of faces. <i>Journal of Psychophysiology</i> , 26, 29-41.                                      |
| cutout grey-scaled faces                   | Akbarfahimi, M., Tehrani-Doost, M., & Ghassemi, F. (2013). Emotional Face Perception in Patients with Schizophrenia: an Event-Related Potential Study. <i>Neurophysiology</i> , 45, 249-257.                                                                                                        |
| cutout grey-scaled faces                   | Almeida, P.R., Ferreira-Santos, F., Vieira, J.B., Moreira, P.S., Barbosa, F., & Marques-Teixeira. (2014). Dissociable effects of psychopathic traits on cortical and subcortical visual pathways during facial emotion processing: an ERP study on the N170. <i>Psychophysiology</i> , 51, 645-657. |
| clear definition could not be retrieved    | Andreatta, M., Puschmann, A.K., Sommer, C., Weyers, P., Pauli, P., & Mühlberger, A. (2012). Altered processing of emotional stimuli in migraine: an event-related potential study. <i>Cephalalgia</i> , 32, 1101-1108.                                                                              |
| cutout grey-scaled faces                   | Baggott, S., Palermo, R., & Fox, A.M. (2011). Processing emotional category congruency between emotional facial expressions and emotional words. <i>Cognition and Emotion</i> , 25, 369-379.                                                                                                        |
| other (artificial close-up coloured faces) | Bauser, D. S., Thoma, P., & Suchan, B. (2012). Turn to me electrophysiological correlates to frontal vs. averted view. <i>Frontiers in Integrative Neuroscience</i> , 6, (106), 1-11                                                                                                                |
| cutout grey-scaled faces                   | Bediou, B., Eimer, M., d'Amato, T., Hauk, O., & Calder, A. J. (2009). In the eye of the beholder: Individual differences in reward-drive modulate early frontocentral ERPs to angry faces. <i>Neuropsychologia</i> , 47(3), 825-834.                                                                |
| close-up coloured faces                    | Blechert, J., Sheppes, G., Di Tella, C., Williams, H. & Gross, J.J. (2012). See what you think: reappraisal modulates behavioral and neural                                                                                                                                                         |
| cutout grey-scaled faces                   | Brennan, A.M., Harris, A.W.F. & Williams, L.M. (2014). Neural processing of facial expressions of emotion in first onset psychosis. <i>Psychiatry Research</i> , 219, 477-485.                                                                                                                      |
| close-up coloured faces                    | Brenner, C. A., Rumak, S. P., Burns, A. M., & Kieffaber, P. D. (2014). The role of encoding and attention in facial emotion memory: an EEG investigation. <i>International journal of psychophysiology</i> , 93(3), 398-410.                                                                        |
| close-up coloured faces                    | Brenner, et al (2014) encoding and attention <i>International Journal of Psychophysiology</i> , .pdf                                                                                                                                                                                                |
| close-up coloured faces                    | Bublitzky, F., Gerdes, A., White, A. J., Riemer, M., & Alpers, G. W. (2014). Social and emotional relevance in face processing: happy faces of future interaction partners enhance the late positive potential. <i>Frontiers in human neuroscience</i> , 8, 493.                                    |
| coloured cutout faces                      | Calvo, M. G., Marrero, H., & Beltrán, D. (2013). When does the brain distinguish between genuine and ambiguous smiles? An ERP study. <i>Brain and Cognition</i> , 81(2), 237-246.                                                                                                                   |
| cutout coloured faces                      | Calvo, M.G., & Beltrán, D. (2014). Brain lateralization of holistic versus analytic processing of emotional facial expressions. <i>Neuroimage</i> , 92, 237-247.                                                                                                                                    |
| close-up grey-scaled faces                 | Chammat, M., Foucher, A., Nadel, J., & Dubal, S. (2010). Reading sadness beyond human faces. <i>Brain Research</i> , 1348, 95-104.                                                                                                                                                                  |
| close-up grey-scaled faces                 | Chen, J., Ma, V., Zhang, Y., Wu, X., Wei, D., Liu, G., Deng, Z., Yang, L., & Zhang, Z. (2014). Distinct facial processing related negative cognitive bias in first-episode and recurrent major depression: evidence from the N170 ERP component. <i>PLoS ONE</i> , 9(10), e109176.                  |

## Supplementary Materials: Modulation of face- and emotion-selective ERPs by the three most common types of face image manipulations

- 1  
2  
3
- 4 close-up grey-scaled Chronaki, G., Broyd, S. J., Garner, M., Benikos, N., Thompson, M. J., Sonuga-Barke, E. J., & Hadwin, J. A. (2018). The Moderating  
5 faces Effect of Self-Reported State and Trait Anxiety on the Late Positive Potential to Emotional Faces in 6–11-Year-Old Children. *Frontiers*  
6 in Psychology, 9, 125.
- 7 close-up coloured faces Conty, L., Dezeache, G., Hugueville, L., & Grezes, J. (2012). Early binding of gaze, gesture and emotion: neural time course and  
8 with full body correlates. *Journal of Neuroscience*, 32, 4531-4539.
- 9 close-up coloured faces Croft, R.J., McKernan, F., Gray, M., Churchyard, A., & Georgiou-Karistianis, N. (2014). Emotion perception and electrophysiological  
10 correlates in Huntington's disease. *Clinical Neurophysiology*, 125, 1618-1625.
- 11 close-up grey-scaled Denefrio, S., Simmons, A., Jha, A., & Dennis-Tiwary, T. A. (2017). Emotional cue validity effects: The role of neurocognitive responses  
12 faces to emotion. *PLoS one*, 12(7), e0179714.
- 13 close-up grey-scaled DiGangi, J. A., Gorka, S., Afshar, K., Babione, J. M., Schroth, C., Greenstein, J. E., ... & Phan, K. L. (2018). Differential impact of post-  
14 faces deployment stress and PTSD on neural reactivity to emotional stimuli in Iraq and Afghanistan veterans. *Journal of psychiatric research*,  
15 96, 9-14.
- 16 close-up grey-scaled Dubal, S., Foucher, A., Jouvent, R., & Nadel, J. (2010). Human brain spots emotion in non humanoid robots. *Social Cognitive and*  
17 faces *Affective Neuroscience*, 6(1), 90-97.
- 18 close-up coloured faces Fajkowska, M., Eysenck, M. W., Zagórska, A., & Jaśkowski, P. (2011). ERP responses to facial affect in low-anxious, high-anxious,  
19 repressors and defensive high-anxious individuals. *Personality and Individual Differences*, 50(7), 961-976.
- 20 close-up coloured faces Fölster, M., & Werheid, K. (2016). ERP evidence for own-age effects on late stages of processing sad faces. *Cognitive, Affective, &*  
21 *Behavioral Neuroscience*, 16(4), 635-645.
- 22 close-up coloured faces Foti, D., Olvet, D. M., Klein, D. N., & Hajcak, G. (2010). Reduced electrocortical response to threatening faces in major depressive  
23 disorder. *Depression and anxiety*, 27(9), 813-820.
- 24 other (schematic close-up Frühholz, S., Fehr, T., & Herrmann, M. (2009). Early and late temporo-spatial effects of contextual interference during perception of  
25 grey-scaled faces) facial affect. *International Journal of Psychophysiology*, 74, 1-13.
- 26 other (schematic cutout Frühholz, S., Jellinghaus, A., & Herrmann, M. (2011). Time course of implicit processing and explicit processing of emotional faces and  
27 grey-scaled faces) emotional words. *Biological psychology*, 87(2), 265-274.
- 28 close-up coloured faces Hagemann, J., Straube, T., & Schulz, C. (2016). Too bad: Bias for angry faces in social anxiety interferes with identity processing.  
29 *Neuropsychologia*, 84, 136-149.
- 30 close-up coloured faces Herbert, C., Sfarlea, A., & Blumenthal, T. (2013). Your emotion or mine: labeling feelings alters emotional face perception-an ERP  
31 study on automatic and intentional affect labeling. *Frontiers in Human Neuroscience*, 7:378. doi: 10.3389/fnhum.2013.00378.
- 32 close-up coloured faces Hofman, D., Terburg, D., van Wielink, L., & Schutter, D.J. (2008). Coalescence of dominance motivation and responses to facial anger  
33 in resting-state and event-related electrophysiology. *Neuroimage*, 79, 138-144-
- 34 cutout grey-scaled faces Itier, R. J., & Neath-Tavares, K. N. (2017). Effects of task demands on the early neural processing of fearful and happy facial  
35 expressions. *Brain research*, 1663, 38-50.
- 36 cutout grey-scaled faces Jaworska, N., Blier, P., Fusee, W., & Knott, V. (2012). The temporal electrocortical profile of emotive facial processing in depressed  
37 males and females and healthy controls. *Journal of affective disorders*, 136, 1072-1081.
- 38 cutout grey-scaled faces Jaworska, N., Thompson, A., Shah, D., Fisher, D., Ilivitsky, V., & Knott, V. (2010). Electrocortical effects of acute tryptophan depletion  
39 on emotive facial processing in depression-prone individuals. *European Neuropsychopharmacology*, 20, 473-486.
- 40 cutout grey-scaled faces Jetha, M. K., Zheng, X., Schmidt, L. A., & Segalowitz, S. J. (2012). Shyness and the first 100 ms of emotional face processing. *Social*  
41 *neuroscience*, 7, 74-89.
- 42  
43  
44  
45  
46

## Supplementary Materials: Modulation of face- and emotion-selective ERPs by the three most common types of face image manipulations

- 1  
2  
3
- 4 other (artificial cutout  
5 coloured faces) Jiang, Y. I., Li, W., Recio, G., Liu, Y., Luo, W., Zhang, D., & Sun, D. (2014). Time pressure inhibits dynamic advantage in the  
6 cutout grey-scaled faces classification of facial expressions of emotion. *PLoS ONE*, 9, e100162.
- 7 close-up coloured faces Jiang, Y. I., Shannon, R. W., Vizuetta, N., Bernat, E. M., Patrick, C. J., & He, S. (2009). Dynamics of processing invisible faces in the  
8 pictures in schizophrenia patients. *Schizophrenia research*, 136, 150-159.
- 9 cutout grey-scaled faces Jung, H. T., Kim, D. W., Kim, S., Im, C. H., & Lee, S. H. (2012). Reduced source activity of event-related potentials for affective facial  
10 faces. *Social neuroscience*, 11(5), 531-544.
- 11 clear definition could not  
12 be retrieved Kawamoto, T., Nittono, H., & Ura, M. (2014). Social exclusion induces early-stage perceptual and behavioral changes in response to  
13 close-up grey-scaled social cues. *Social neuroscience*, 9(2), 174-185.
- 14 faces Kirihara, K., Kasai, K., Tada, M., Nagai, T., Kawakubo, Y., Yamasaki, S., ... & Araki, T. (2012). Neurophysiological impairment in  
15 emotional face processing is associated with low extraversion in schizophrenia. *Progress in Neuro-psychopharmacology and  
16 Biological Psychiatry*, 37, 270-275.
- 17 cutout grey-scaled faces Komlósi, S., Csukly, G., Stefanics, G., Czigler, I., Bitter, I., & Czobor, P. (2013). Fearful face recognition in schizophrenia: An  
18 electrophysiological study. *Schizophrenia research*, 149(1), 135-140.
- 19 close-up coloured faces Kühnpast, N., Gramann, K., & Pollatos, O. (2012). Electrophysiologic Evidence for Multilevel Deficits in Emotional Face Processing in  
20 Patients With Bulimia Nervosa. *Psychosomatic medicine*, 74, 736-744.
- 21 close-up grey-scaled Langeslag, S. J., Morgan, H. M., Jackson, M. C., Linden, D. E., & Van Strien, J. W. (2009). Electrophysiological correlates of improved  
22 faces short-term memory for emotional faces. *Neuropsychologia*, 47, 887-896.
- 23 coloured cutout faces Liu, T., Pinheiro, A., Zhao, Z., Nestor, P. G., McCarley, R. W., & Niznikiewicz, M. A. (2012). Emotional cues during simultaneous face  
24 and voice processing: electrophysiological insights. *PLoS one*, 7, e31001.
- 25 close-up coloured faces Luckhardt, C., Kröger, A., Cholemkery, H., Bender, S., & Freitag, C. M. (2017). Neural Correlates of Explicit Versus Implicit Facial  
26 Emotion Processing in ASD. *Journal of autism and developmental disorders*, 47(7), 1944-1955.
- 27 cutout grey-scaled faces Luo, W., Feng, W., He, W., Wang, N. Y., & Luo, Y. J. (2010). Three stages of facial expression processing: ERP study with rapid serial  
28 visual presentation. *Neuroimage*, 49(2), 1857-1867.
- 29 close-up grey-scaled MacNamara, A., Schmidt, J., Zelinsky, G. J., & Hajcak, G. (2012). Electrocutaneous and ocular indices of attention to fearful and neutral  
30 faces presented under high and low working memory load. *Biological psychology*, 91, 349-356.
- 31 close-up grey-scaled Marzi, T., & Viggiano, M. P. (2010). When memory meets beauty: Insights from event-related potentials. *Biological psychology*, 84(2),  
32 faces 192-205.
- 33 cutout grey-scaled faces Maurage, P., Campanella, S., Philippot, P., Timary, P., Constant, E., Gauthier, S., Micciche, M.-L., Kornreich, C., Hanak, C., Noel, X. &  
34 Verbanck, P. (2008). Alcoholism leads to early perceptive alterations, independently of comorbid depressed state: An ERP study.  
35 *Clinical Neurophysiology*, 38, 83-97.
- 36 coloured cutout faces Mavratzakis, A., Herbert, C., & Walla, P. (2016). Emotional facial expressions evoke faster orienting responses, but weaker emotional  
37 responses at neural and behavioural levels compared to scenes: A simultaneous EEG and facial EMG study. *Neuroimage*, 124, 931-  
38 946.
- 39 close-up grey-scaled Meaux, E., Roux, S. & Batty, M. (2013). Early visual ERPs are influenced by individual emotional skills. *Social Cognitive and Affective  
40 Neuroscience*, 2013, 1-10.
- 41  
42  
43  
44  
45  
46

## Supplementary Materials: Modulation of face- and emotion-selective ERPs by the three most common types of face image manipulations

- 1  
2  
3
- 4 cutout grey-scaled faces Morel, S., George, N., Foucher, A., Chammat, M. & Dubal, S. (2014). ERP evidence for an early emotional bias towards happy faces  
5 in trait anxiety. *Biological Psychology*, 99, 183-192.
- 6 other (artificial close-up Mühlberger, A., Wieser, M., Herrmann, M., Weyers, P., Tröger, C., & Pauli, P. (2009). Early cortical processing of natural and artificial  
7 coloured faces) emotional faces differs between lower and higher socially anxious persons. *Journal of Neural Transmission*, 116, 735-746.
- 8 cutout coloured faces Müller-Bardorff, M., Schulz, C., Peterburs, J., Bruchmann, M., Mothes-Lasch, M., Miltner, W., & Straube, T. (2016). Effects of  
9 emotional intensity under perceptual load: an event-related potentials (ERPs) study. *Biological psychology*, 117, 141-149.
- 10 cutout coloured faces Nomi, J.S., Frances, C., Nguyen, M.T., Bastidas, S., & Troup, L.J. (2013). Interaction of threat expressions and eye gaze: an event-  
11 related potential study. *Neuroreport*, 24, 813-817.
- 12 close-up grey-scaled O'Toole, L. J., DeCicco, J. M., Berthod, S., & Dennis, T. A. (2013). The N170 to angry faces predicts anxiety in typically developing  
13 faces children over a two-year period. *Developmental neuropsychology*, 38(5), 352-363.
- 14 close-up grey-scaled Obayashi, C., Nakashima, T., Onitsuka, T., Maekawa, T., Hirano, Y., Hirano, S., Oribe, N., Kaneko, K., Kanba, S. & Tobimatsu. (2009).  
15 faces Decreased spatial frequency sensitivities for processing faces in male patients with chronic schizophrenia. *Clinical Neurophysiology*,  
120, 1525-1533.
- 16 close-up grey-scaled Peltola, M. J., Yrttiaho, S., Puura, K., Proverbio, A. M., Mononen, N., Lehtimäki, T., & Leppänen, J. M. (2014). Motherhood and  
17 faces oxytocin receptor genetic variation are associated with selective changes in electrocortical responses to infant facial expressions.  
18 *Emotion*, 14(3), 469.
- 19 close-up grey-scaled Peng, M., Beuckelaer, A., Yuan, L. & Zhou, R. (2012). The processing of anticipated and unanticipated fearful faces: An ERP study.  
20 faces *Neuroscience Letters*, 526, 85-90.
- 21 cutout grey-scaled faces Peschard, V., Philippot, P., Joassin, F. & Rossignol, M. (2013). The impact of the stimulus features and task instructions on facial  
22 (with different processing in social anxiety: An ERP investigation. *Biological Psychology*, 93, 88-96.  
23 background colours)
- 24 close-up coloured faces Raz, S. & Dan, O. (2014). Altered event-related potentials in adults with ADHD during emotional faces processing. *Clinical  
25 Neurophysiology*, 126, 514-523.
- 26 close-up coloured faces Raz, S., Dan, O. & Zysberg, L. (2014). Neural correlates of emotional intelligence in a visual emotional oddball task: An ERP study.  
27 *Brain and Cognition*, 91, 79-86.
- 28 other (artificial cutout Recio, G., Sommer, W. & Schacht, A. (2011). Electrophysiological correlates of perceiving and evaluating static and dynamic facial  
29 coloured faces) emotioal expressions. *Brain Research*, 1376, 66-75.
- 30 cutout coloured faces Rellecke, J., Palazova, M., Sommer, W., & Schacht, A. (2011). On the automaticity of emotion processing in words and faces: event-  
31 related brain potentials evidence from a superficial task. *Brain and cognition*, 77(1), 23-32.
- 32 cutout coloured faces Rellecke, J., Sommer, W. & Schacht, A. (2013). Emotion effects on the N170: A question of reference? *Brain Topography*, 26, 62-71.
- 33 cutout coloured faces Rellecke, J., Sommer, W., & Schacht, A. (2012). Does processing of emotional facial expressions depend on intention? Time-resolved  
34 evidence from event-related brain potentials. *Biological psychology*, 90(1), 23-32.
- 35 close-up grey-scaled Righi, S., Marzi, T., Toscani, M., Baldassi, S., Ottonello, S., & Viggiano, M. P. (2012). Fearful expressions enhance recognition  
36 faces memory: electrophysiological evidence. *Acta psychologica*, 139(1), 7-18.
- 37 close-up coloured faces Rigoulot, S., D'Hondt, F., Defoort-Dhellemmes, S., Desprez, P., Honoré, J. & Sequeira, H. (2011). Fearful faces impact in peripheral  
38 vision: behavioral and neutral evidence. *Neuropsychologia*, 49, 2013-2021.
- 39 cutout grey-scaled faces Rossignol, M., Campanella, S., Maurage, P. & Heeren, A. (2012). Enhanced perceptual responses during visual processing of facial  
40 stimuli in young socially anxious individuals. *Neuroscience Letters*, 526, 68-73.
- 41  
42  
43  
44  
45  
46

## Supplementary Materials: Modulation of face- and emotion-selective ERPs by the three most common types of face image manipulations

- 1  
2  
3
- 4 close-up grey-scaled faces Rossignol, M., Philippot, P., Crommelinck, M. & Campanella, S. (2008). Visual processing of emotional expressions in mixed anxious-depressed subclinical state: An event-related potential study on a female sample. *Clinical Neurophysiology*, 38, 267-275.
- 5  
6 cutout grey-scaled faces Santesso, D., Meuret, A., Hofmann, S., Muelles, E., Ratner, K., Roesch, E. & Pizzagalli, D. (2008). Electrophysiological correlates of spatial orienting towards angry faces: a source localization study. *Neuropsychologia*, 46, 1338-1348.
- 7  
8 close-up grey-scaled faces Schacht, A., & Sommer, W. (2009). Emotions in word and face processing: early and late cortical responses. *Brain and cognition*, 69(3), 538-550.
- 9  
10 close-up coloured faces cutout grey-scaled faces Schindler et al. 2017 Scientific Reports
- 11 Schmidt, A., Kometer, M., Bachmann, R., Seifritz, E. & Vollenweider, F. (2013). The NMDA antagonist ketamine and the 5-HT agonist psilocybin produce dissociable effects on structural encoding of emotional face expressions. *Psychopharmacology*, 225, 227-239.
- 12  
13 other (schematic close-up grey-scaled faces) Schwab, D., & Schienle, A. (2017). Facial affect processing in social anxiety disorder with early onset: evidence of an intensity amplification bias. *Social neuroscience*, 1-10.
- 14  
15 cutout grey-scaled faces Sel, A., Forster, B. & Calvo-Merino, B. (2014). The emotional homunculus: ERP evidence for independent somatosensory responses during facial emotional processing. *The Journal of Neuroscience*, 34, 3263-3267.
- 16  
17 close-up coloured faces Smith, E., Weinberg, A., Moran, T., & Hajcak, G. (2013). Electrocortical responses to NIMSTIM facial expressions of emotion. *International Journal of Psychophysiology*, 88(1), 17-25.
- 18  
19 cutout grey-scaled faces Smith, M. L. (2011). Rapid processing of emotional expressions without conscious awareness. *Cerebral Cortex*, 22(8), 1748-1760.
- 20  
21 cutout coloured faces Sommer, W., Stürmer, B., Shmuelovitch, O., Martín-Loeches, M. & Schacht, A. (2013). How about lunch? Consequences of the meal context on cognition and emotion. *PLoS ONE*, 8, e70314.
- 22  
23 close-up coloured faces Sun, D., Chan, C. C., Fan, J., Wu, Y., & Lee, T. (2015). Are happy faces attractive? The roles of early vs. late processing. *Frontiers in psychology*, 6, 1812.
- 24  
25 cutout grey-scaled faces Tamamiya, Y. & Hiraki, K. (2013). Individual differences in the recognition of facial expressions: An event-related potentials study. *PLoS ONE*, 8, e57325.
- 26  
27 close-up coloured faces Thom, N., Knight, J., Dishman, R., Sabatinelli, D., Johnson, D. & Clementz, B. (2014). Emotional scenes elicit more pronounced self-reported emotional experience and greater EPN and LPP modulation when compared to emotional faces. *Cognitive Affective and Behavioral Neuroscience*, 14, 849-860.
- 28  
29 close-up coloured faces cutout grey-scaled faces Tortosa, M., Lupiáñez, J. & Ruz, M. (2013). Race, emotion and trust: An ERP study. *Brain research*, 1494, 44-55.
- 30  
31 Valdés-Conroy, B., Aguado, L., Fernández-Cahill, M., Romero-Ferreiro, V., & Diéguez-Risco, T. (2014). Following the time course of face gender and expression processing: a task-dependent ERP study. *International Journal of Psychophysiology*, 92, 59-66.
- 32  
33 close-up grey-scaled faces cutout grey-scaled faces Van Strien, J. W., De Sonnevile, L. M., & Franken, I. H. (2010). The late positive potential and explicit versus implicit processing of facial valence. *Neuroreport*, 21(9), 656-661.
- 34  
35 cutout grey-scaled faces Vlamings, P., Goffaux, V. & Kemner, C. (2009). Is the early modulation of brain activity by fearful facial expressions primarily mediated by coarse low spatial frequency information?. *Journal of Vision*, 9, 1-13.
- 36  
37 close-up coloured faces Walentowska, W. & Wronka, E. (2012). Trait anxiety and involuntary processing of facial emotions. *International Journal of Psychophysiology*, 85, 27-36.
- 38  
39 close-up coloured faces Wieser, M., Gerdes, A., Greiner, R., Reicherts, P. & Pauli, P. (2012). Tonic pain grabs attention, but leaves the processing of facial expressions intact- Evidence from event-related brain potentials. *Biological Psychology*, 90, 242-248.
- 40  
41  
42  
43  
44  
45  
46



## Supplementary Materials: Modulation of face- and emotion-selective ERPs by the three most common types of face image manipulations

|    |                                         |                                                                                                                                                                                                                                                                                                               |
|----|-----------------------------------------|---------------------------------------------------------------------------------------------------------------------------------------------------------------------------------------------------------------------------------------------------------------------------------------------------------------|
| 1  |                                         |                                                                                                                                                                                                                                                                                                               |
| 2  |                                         |                                                                                                                                                                                                                                                                                                               |
| 3  |                                         |                                                                                                                                                                                                                                                                                                               |
| 4  | close-up coloured faces                 | Wieser, M., Klupp, E., Weyers, P., Pauli, P., Weise, D., Zeller, D., Classen, J. & Andreas Mühlberger. (2012). Reduced early visual emotion discrimination as an index of diminished emotion processing in Parkinson's disease?- Evidence from event-related brain potentials. <i>Cortex</i> , 48, 1207-1217. |
| 5  |                                         |                                                                                                                                                                                                                                                                                                               |
| 6  | close-up coloured faces                 | Wieser, M., Pauli, P., Reicherts, P. & Mühlberger, A. (2010). Don't look at me in anger! Enhanced processing of angry faces in anticipation of public speaking. <i>Psychophysiology</i> , 47, 271-280.                                                                                                        |
| 7  |                                         |                                                                                                                                                                                                                                                                                                               |
| 8  | close-up coloured faces                 | Wild-Wall, N., Dimigen, O. & Sommer, W. (2008). Interaction of facial expressions and familiarity: ERP evidence. <i>Biological Psychology</i> , 77, 138-149.                                                                                                                                                  |
| 9  |                                         |                                                                                                                                                                                                                                                                                                               |
| 10 | close-up grey-scaled faces              | Wronka, E., & Walentowska, W. (2011). Attention modulates emotional expression processing. <i>Psychophysiology</i> , 48, 1047-1056.                                                                                                                                                                           |
| 11 |                                         |                                                                                                                                                                                                                                                                                                               |
| 12 | close-up grey-scaled faces              | Yang, S., Luo, W., Zhu, X., Broster, L.S., Chen, T., Li, J., & Luo, Y. (2014). Emotional content modulates response inhibition and perceptual processing. <i>Psychophysiology</i> , 51, 1139-1146.                                                                                                            |
| 13 |                                         |                                                                                                                                                                                                                                                                                                               |
| 14 | close-up coloured faces                 | Yoon, S., Shim, M., Kim, H. S., & Lee, S. H. (2016). Enhanced early posterior negativity to fearful faces in patients with anxiety disorder. <i>Brain topography</i> , 29(2), 262-272.                                                                                                                        |
| 15 |                                         |                                                                                                                                                                                                                                                                                                               |
| 16 | close-up grey-scaled faces              | Yuan, L., Zhou, R., & Hu, S. (2014). Cognitive reappraisal of facial expressions: Electrophysiological evidence of social anxiety. <i>Neuroscience Letters</i> , 577, 45-50.                                                                                                                                  |
| 17 |                                         |                                                                                                                                                                                                                                                                                                               |
| 18 | cutout grey-scaled faces                | Zhang, D., Liu, Y., Zhou, C., Chen, Y., & Luo, Y. (2014). Spatial attention effects of disgusted and fearful faces. <i>PLoS one</i> , 9(7), e101608.                                                                                                                                                          |
| 19 |                                         |                                                                                                                                                                                                                                                                                                               |
| 20 | cutout grey-scaled faces                | Zhang, D., Luo, W., & Luo, Y. (2013). Single-trial ERP analysis reveals facial expression category in a three-stage scheme. <i>Brain research</i> , 1512, 78-88.                                                                                                                                              |
| 21 |                                         |                                                                                                                                                                                                                                                                                                               |
| 22 | cutout grey-scaled faces                | Zhang, D., Wang, L., Luo, Y., & Luo, Y. (2012). Individual differences in detecting rapidly presented fearful faces. <i>PLoS ONE</i> , 7, e49517.                                                                                                                                                             |
| 23 |                                         |                                                                                                                                                                                                                                                                                                               |
| 24 | clear definition could not be retrieved | Zhang, W., & Lu, J. (2012). Time course of automatic emotion regulation during a facial Go/Nogo task. <i>Biological psychology</i> , 89(2), 444-449.                                                                                                                                                          |
| 25 |                                         |                                                                                                                                                                                                                                                                                                               |

---

Please note that a clear definition of face type was not found in all cases, in some cases due to not accessible databases or repositories.
